# Supplementary material for: Protocol for the development and validation of a measure of persistent psychological and emotional distress in cardiac patients: the Cardiac Distress Inventory
Source: PubMed Central journal article supplement — BMJ Open. 2020 Jun 11;10(6):e034946. doi: 10.1136/bmjopen-2019-034946 (PMC7295398; doi:10.1136/bmjopen-2019-034946), 2020-06-11
Supplement: bmjopen-2019-034946.draft_revisions.pdf [file bmjopen-2019-034946.draft_revisions.pdf]

# BMJ Open

BMJ Open is committed to open peer review. As part of this commitment we make the peer review history of every article we publish publicly available.

When an article is published we post the peer reviewers' comments and the authors' responses online. We also post the versions of the paper that were used during peer review. These are the versions that the peer review comments apply to.

The versions of the paper that follow are the versions that were submitted during the peer review process. They are not the versions of record or the final published versions. They should not be cited or distributed as the published version of this manuscript.

BMJ Open is an open access journal and the full, final, typeset and author-corrected version of record of the manuscript is available on our site with no access controls, subscription charges or pay-per-view fees (<http://bmjopen.bmj.com>).

If you have any questions on BMJ Open's open peer review process please email [info.bmjopen@bmj.com](mailto:info.bmjopen@bmj.com)

# BMJ Open

## Protocol for the development and validation of a measure of persistent psychological and emotional distress in cardiac patients: The Cardiac Distress Inventory

|                               |                                                                                                                                                                                                                                                                                                                                                                                                                                                                                                                                                                                                                                                                                                                                                                                                                                                                                                                                                                                                                                                     |
|-------------------------------|-----------------------------------------------------------------------------------------------------------------------------------------------------------------------------------------------------------------------------------------------------------------------------------------------------------------------------------------------------------------------------------------------------------------------------------------------------------------------------------------------------------------------------------------------------------------------------------------------------------------------------------------------------------------------------------------------------------------------------------------------------------------------------------------------------------------------------------------------------------------------------------------------------------------------------------------------------------------------------------------------------------------------------------------------------|
| Journal:                      | <i>BMJ Open</i>                                                                                                                                                                                                                                                                                                                                                                                                                                                                                                                                                                                                                                                                                                                                                                                                                                                                                                                                                                                                                                     |
| Manuscript ID                 | bmjopen-2019-034946                                                                                                                                                                                                                                                                                                                                                                                                                                                                                                                                                                                                                                                                                                                                                                                                                                                                                                                                                                                                                                 |
| Article Type:                 | Protocol                                                                                                                                                                                                                                                                                                                                                                                                                                                                                                                                                                                                                                                                                                                                                                                                                                                                                                                                                                                                                                            |
| Date Submitted by the Author: | 12-Oct-2019                                                                                                                                                                                                                                                                                                                                                                                                                                                                                                                                                                                                                                                                                                                                                                                                                                                                                                                                                                                                                                         |
| Complete List of Authors:     | Jackson, Alun; Australian Centre for Heart Health,; Deakin University Faculty of Health<br>Rogerson, Michelle; Australian Centre for Heart Health<br>Le Grande , Michael; Australian Centre for Heart Health; University of Melbourne, Centre for Behaviour Change, Melbourne School of Psychological Sciences<br>Thompson, David; Queen's University Belfast, School of Nursing and Midwifery; Australian Centre for Heart Health<br>Ski, Chantal; Queen's University, Belfast, School of Nursing and Midwifery; Australian Centre for Heart Health<br>Alvarenga, Marlies; Federation University Australia - Berwick Campus, School of Health and Life Sciences; MonashHeart, Monash Cardiovascular Research Centre<br>Amerena, John; Barwon Health, Cardiac Services; Deakin School of Medicine<br>Higgins, Rosemary; Australian Centre for Heart Health; Deakin University, Faculty of Health<br>Raciti, Michela; Australian Centre for Heart Health<br>Murphy, Barbara; Australian Centre for Heart Health; Deakin University Faculty of Health |
| Keywords:                     | Adult cardiology < CARDIOLOGY, Protocols & guidelines < HEALTH SERVICES ADMINISTRATION & MANAGEMENT, Cardiology < INTERNAL MEDICINE, MENTAL HEALTH                                                                                                                                                                                                                                                                                                                                                                                                                                                                                                                                                                                                                                                                                                                                                                                                                                                                                                  |
|                               |                                                                                                                                                                                                                                                                                                                                                                                                                                                                                                                                                                                                                                                                                                                                                                                                                                                                                                                                                                                                                                                     |

SCHOLARONE™  
Manuscripts

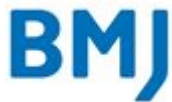

I, the Submitting Author has the right to grant and does grant on behalf of all authors of the Work (as defined in the below author licence), an exclusive licence and/or a non-exclusive licence for contributions from authors who are: i) UK Crown employees; ii) where BMJ has agreed a CC-BY licence shall apply, and/or iii) in accordance with the terms applicable for US Federal Government officers or employees acting as part of their official duties; on a worldwide, perpetual, irrevocable, royalty-free basis to BMJ Publishing Group Ltd ("BMJ") its licensees and where the relevant Journal is co-owned by BMJ to the co-owners of the Journal, to publish the Work in this journal and any other BMJ products and to exploit all rights, as set out in our [licence](#).

The Submitting Author accepts and understands that any supply made under these terms is made by BMJ to the Submitting Author unless you are acting as an employee on behalf of your employer or a postgraduate student of an affiliated institution which is paying any applicable article publishing charge ("APC") for Open Access articles. Where the Submitting Author wishes to make the Work available on an Open Access basis (and intends to pay the relevant APC), the terms of reuse of such Open Access shall be governed by a Creative Commons licence – details of these licences and which [Creative Commons](#) licence will apply to this Work are set out in our licence referred to above.

Other than as permitted in any relevant BMJ Author's Self Archiving Policies, I confirm this Work has not been accepted for publication elsewhere, is not being considered for publication elsewhere and does not duplicate material already published. I confirm all authors consent to publication of this Work and authorise the granting of this licence.

1  
2  
3 **Protocol for the development and validation of a measure of persistent psychological and**  
4 **emotional distress in cardiac patients: The Cardiac Distress Inventory**  
5  
6  
7

8 **Alun C Jackson** PhD (Corresponding author), Director, Australian Centre for Heart Health,  
9 Melbourne, Victoria, Australia; Honorary Professor, Faculty of Health, Deakin University, Geelong,  
10 Australia; Honorary Professor, Centre on Behavioural Health, University of Hong Kong, Pokfulam,  
11 Hong Kong. Address: PO Box 2137, The Royal Melbourne Hospital, Victoria 3050 Australia; Ph: +61 3  
12 9326 8544; Email: [alun.jackson@australianhearthealth.org.au](mailto:alun.jackson@australianhearthealth.org.au)  
13  
14

15 **Michelle Rogerson** PhD, Research Fellow, Australian Centre for Heart Health, Melbourne, Australia.

16 **Michael R Le Grande** MPH, Senior Research Fellow, Australian Centre for Heart Health, Melbourne,  
17 Australia; Research Fellow, Centre for Behaviour Change, Melbourne School of Psychological  
18 Sciences, University of Melbourne, Melbourne, Australia.  
19

20 **David R Thompson** PhD, Professor, School of Nursing and Midwifery, Queen's University Belfast, UK;  
21 Honorary Professorial Fellow, Australian Centre for Heart Health, Melbourne, Australia; Honorary  
22 Professor, Department of Psychiatry, University of Melbourne, Melbourne, Australia.  
23  
24

25 **Chantal F Ski** PhD, Reader, School of Nursing and Midwifery, Queen's University Belfast, UK;  
26 Honorary Principal Research Fellow, Australian Centre for Heart Health, Melbourne, Australia;  
27 Honorary Associate Professor, Department of Psychiatry, University of Melbourne, Melbourne,  
28 Australia.  
29

30 **Marlies E Alvarenga** PhD, Lecturer in Psychology, School of Health and Life Sciences, Federation  
31 University Australia, Berwick, Australia; Consultant Clinical Psychologist, Monash Cardiovascular  
32 Research Centre, MonashHEART, Melbourne, Australia & Monash Health & Department of Medicine,  
33 Monash University, Melbourne, Australia & Australian Centre for Heart Health, Melbourne, Australia  
34  
35

36 **John Amerena** MB BS, Director of Cardiac Services, Barwon Health, Geelong, Australia; Clinical  
37 Associate Professor, Deakin School of Medicine, University Hospital Geelong, Geelong, Australia.  
38

39 **Rosemary O Higgins** DPsych, Clinical Consultant (Health Psychology), Australian Centre for Heart  
40 Health, Melbourne, Australia; Honorary Associate Professor, Department of Psychology, Deakin  
41 University, Geelong, Australia; Honorary Associate Professor, Department of Physiotherapy,  
42 University of Melbourne, Melbourne, Australia.  
43  
44

45 **Michela Raciti** BPsych, Research Intern, Australian Centre for Heart Health, Melbourne, Australia

46 **Barbara M Murphy** PhD, Principal Researcher, Australian Centre for Heart Health, Melbourne,  
47 Australia; Honorary Associate Professor, Faculty of Health, Deakin University, Geelong, Australia;  
48 Honorary Senior Research Fellow, Department of Psychology, University of Melbourne, Melbourne,  
49 Australia.  
50

51 **Key words:** cardiac distress, anxiety, depression, psychometrics, instrument development  
52

53 **Word count:** 4371  
54  
55  
56  
57  
58  
59  
60

## ABSTRACT

**Introduction** Distress is experienced by the majority of cardiac patients, yet no cardiac-specific measure of distress exists. The aim of this project is to develop and validate the Cardiac Distress Inventory (CDI). Using the CDI, health professionals will be able to identify key clusters of psychological, emotional and social concern to address with patients, post-cardiac event. Psychometric testing of a long form questionnaire will also result in the development of a short form screening version.

**Methods and analysis** An item pool will be generated through: identification of items by a multidisciplinary group of clinician researchers; review of generic and condition-specific distress measures; focus group testing with cardiac rehabilitation professionals; feedback from patients. The COSMIN criteria will be used to inform the development of the methodology for determining the CDI's psychometric properties. The item pool will be tested with 400 cardiac patients and responses subjected to exploratory factor analysis, Rasch analysis, test-retest reliability, construct validity testing, and latent class analysis. ROC analysis will be used to identify the optimal CDI cut off score for distinguishing whether a person experiences clinically significant distress. The study will take place over a 15 to 18-month period.

**Ethics and dissemination** This protocol has been approved by the Monash Health Human Research Ethics Committee (Approval number – RES-19-0000631L-55979 0). The CDI will be made available to clinicians and researchers without charge. The CDI will be translated for use with clinical populations internationally with reporting of the psychometric properties of those versions. Study findings will be shared with cardiac patient support groups; academic and medical communities via publications and presentations; in the training of cardiac secondary prevention health professionals; and in reports to funders. Authorship for all publications will be determined in line with the Uniform Requirements for Manuscripts Submitted to Biomedical Journals.

### Strengths and limitations of this study

- This protocol describes the development and validation of the first available cardiac-specific distress measure.
- The measure is based on a multidisciplinary conceptualisation of the core construct, cardiac distress, while building on similar scale development in oncology and diabetes.
- The protocol describes a co-design process involving both cardiac patients and health professionals in item-generation and involves a range of quantitative psychometric methods in item-testing.
- We will compare a statistically-driven and a clinically-driven method to develop a short-form of the measure for use as a screening tool.

## BACKGROUND

### Conceptualisation of cardiac distress

As high prevalence conditions, much attention has been paid to the measurement and understanding of anxiety and depression as consequences of cardiac events. However, relatively little attention has been given to the phenomenon of 'cardiac distress' which many patients experience after acute coronary events such as myocardial infarction (AMI), unstable angina, or coronary artery bypass graft surgery (CABGS). In an earlier paper, we discussed the conceptualisation of cardiac distress and defined it as:

"a persistent negative emotional state rather than a transient state; involving multiple psychosocial domains; that challenges a patient's capacity to cope with living with their heart condition, the treatment of the condition, and the resultant changes to daily living; and challenges the person's sense of self and future orientation"<sup>1</sup>.

A number of previous studies have attempted to examine the relationship between post-cardiac event distress, symptom severity and mortality in relation to a range of specific heart conditions<sup>2, 3</sup> and procedures<sup>4, 5</sup>, following cardiac rehabilitation<sup>6</sup>, and in cardiovascular disease more generally<sup>7</sup>. A common characteristic of these studies, however, is the use of terms such as 'distress' without explicit definition. In some cases, distress is simply defined as being that which is measured by an instrument deemed to measure distress such as the Hospital Anxiety and Depression Scale<sup>8</sup>, the General Health Questionnaire<sup>9</sup> or the Kessler Psychological Distress Scale<sup>10</sup>. Typically, these studies view psychological or emotional distress as a simple combination of anxiety and depression, as does a recent analysis of post-cardiac event psychological distress trajectories<sup>11</sup>.

A small number of studies, however, widen this narrow view of distress by adding other psychosocial constructs to 'anxiety plus depression', including stress and stressful life events<sup>12-14</sup>; fear of death<sup>13, 15</sup>; hostility<sup>12</sup>; vital exhaustion and reduced quality of life<sup>14</sup>; vulnerabilities such as lack of pleasant events, dysfunctional attitudes, role transitions and poor dyadic adjustment<sup>16</sup>; feelings of helplessness, loss of control, and pain<sup>15</sup>; and psychological wellbeing<sup>6</sup>.

### The 'cardiac blues'

A broader approach to understanding the complexity of the psychological and emotional impacts of a cardiac event is evidenced in the concept of the 'cardiac blues' which describes a range of emotional responses to an acute cardiac event. It has been suggested that almost all patients experience at least some symptoms of the cardiac blues at the time of, or soon after, an acute cardiac event<sup>17</sup>. Common emotions include shock, low or fluctuating mood, sadness, worry, guilt and anger. Mood changes are displayed by tiredness, irritability, tearfulness, loss of pleasure in usual activities, withdrawal from others, early waking and other sleep disturbance, and changes in appetite and sex drive. Cognitive changes that typically co-occur include confusion and forgetfulness, inability to concentrate, nightmares, reduced self-esteem, concerns about role changes, particularly regarding paid work, physical health and independence; and pessimism about the future<sup>17-19</sup>. Although generally a transient condition<sup>20, 21</sup>, if the cardiac blues does not resolve within around two months of the cardiac event, the psychological and emotional impact of the event can result in persistent cardiac distress<sup>18, 19</sup>.

### Measuring condition-specific distress

Both the oncology and diabetes fields have at least a two decade-long history of screening and psychosocial intervention for condition-specific distress. For oncology, this is reflected in the National Comprehensive Cancer Network Guidelines for Distress Management<sup>22</sup> where distress is considered to be a multifactorial unpleasant experience of a psychological (i.e., emotional, behavioural, cognitive), social, spiritual, and/or physical nature that may interfere with the ability to cope effectively with cancer, its physical symptoms or its treatment. An excellent earlier attempt to

conceptualise diabetes distress so that it could be recognised and addressed in nursing practice<sup>23</sup>, has recently been extended by Dennick and colleagues<sup>24</sup>. They characterise distress as a range of negative emotional responses, such as worry, fear, frustration, guilt, sadness, anger, to aspects of living with and managing the condition, balanced against an appraisal of available coping resources<sup>24</sup>. Snoek and colleagues argue that diabetes-distress and depression are correlated and overlapping constructs, but are not interchangeable, and that distinguishing between them is an important factor in shaping appropriate mental health interventions<sup>25</sup>. In a recent systematic review of the impact of distress on health-related outcomes, Barry and colleagues agree also that distress is distinct from depression and should be assessed using condition-specific measures, as early as practicable in treatment<sup>26</sup>.

### **Cardiac-specific measures of the psychosocial impact of cardiac events**

The cardiac field also has a two decade-long history of attempts to measure aspects of the psychological and emotional impact of cardiac events. Examples of cardiac-specific measures include the Cardiac Depression Scale<sup>27</sup>, the Cardiac Event Threat Questionnaire<sup>28</sup>, the Cardiac Anxiety Questionnaire<sup>29</sup>, the MacNew Quality of Life measure<sup>30</sup> and the Screening Tool for Psychological Distress (STOP-D)<sup>31</sup>. These measures collectively assess a range of features associated with cardiac distress such as impaired quality of life, anxiety, depression, fear, death anxiety, illness-related dependency, feeling unable to cope, stress, worrying levels of pain, low perceived social support, and anger. However, none of the measures provides a comprehensive or detailed assessment of cardiac distress. Moreover, no currently existing measure would enable a psychocardiology professional to identify priority areas clearly enough to offer timely tailored psychosocial intervention for a distressed patient<sup>32, 33</sup>. Using the CDI, health professionals will be able to identify key clusters of psychological, emotional and social concern to address with patients, post-cardiac event.

### **Aims**

The aims of the present study are:

1. To develop and validate the Cardiac Distress Inventory (CDI).
2. To develop a short form screening tool version of the CDI.

## **METHOD**

### **Item generation**

There are six steps in the item generation procedure:

- i. Initial generation of items by a multidisciplinary group of researchers and clinicians including the disciplines of nursing, psychiatry, behavioural health, psychology and cardiology.
- ii. Review of generic and condition-specific distress measures, to identify the elements comprising the construct of 'distress' in those measures and to identify items which could be adapted for the CDI.
- iii. Review of cardiac-specific measures incorporating elements of distress as defined by the present authors<sup>1</sup>.
- iv. Review of items for appropriateness for a post-operative cardiac population by the multidisciplinary investigator group.
- v. Focus group testing with two multidisciplinary groups of cardiac rehabilitation professionals: experienced practitioners undertaking intensive training in cardiac rehabilitation through the Australian Centre for Heart Health; and the National Executive of the Australian Cardiovascular Health and Rehabilitation Association (ACRA).



- vi. Consultation with, and feedback from, cardiac patients (key informants) on the structure and content of the CDI.

### Patient and public involvement

The need for a comprehensive measure of cardiac-related distress has been identified by the multidisciplinary clinician researcher members of the CDI development group, through their clinical practice in provision of psychosocial support to cardiac patients. This need has been endorsed by the authors' consultations with both individual patients and patient support groups such as the hospital-based or regionally-based Heart Beat programs such as Heart Beat Victoria. As evident from step vi in the item generation procedure, patients will be consulted as key informants about the structure and content of the CDI. Only after this process of consultation is complete will the CDI item pool be tested with 400 cardiac patients.

The result of the CDI development project, the psychometrically sound Cardiac Distress Inventory, will be made available to clinicians and researchers without charge, but with a request that data collected in studies using the measure will be made available for aggregation and analysis in future. The CDI will also be translated for use with clinical populations internationally with reporting of the psychometric properties of those versions. Confirmed translations will be Italian, Hebrew, Arabic, Farsi, and Spanish. Study findings will be shared with community members, particularly cardiac patient support groups such as the Heart Beat groups and their equivalents internationally; academic and medical communities via publications and presentations; in an online course in its rationale and use provided at no cost by the Australian Centre for Heart Health. The short form will be made available on the website of the Australian Centre for Heart Health for completion by patients to self-screen with suggestions for follow up psychological support where indicated.

### Cardiac Distress Inventory design

Items generated through the process outlined above will be reworded where appropriate to ensure relevance to the measurement of cardiac distress, and appropriateness of fit with the following instruction and response set:

*Living with a heart condition can sometimes be difficult. Listed below are some issues that people living with a heart condition may experience.*

*Please indicate whether or not you have experienced each issue during the past four weeks by checking 'Yes' or 'No'. For each item you have checked 'Yes', indicate how much distress this issue has caused you for the past four weeks, from 0 to 3, where "0" is no distress and "3" is severe distress.*

| Issue                                             | Yes                   | No                    | If yes, indicate how much distress this causes for you |                 |                   |                 |
|---------------------------------------------------|-----------------------|-----------------------|--------------------------------------------------------|-----------------|-------------------|-----------------|
|                                                   |                       |                       | No distress at all                                     | Slight distress | Moderate distress | Severe distress |
| Example: Having more pain than I expected to have | <input type="radio"/> | <input type="radio"/> | 0                                                      | 1               | 2                 | 3               |

### Trialling of the questionnaire for item reduction

#### **Sample size required for trial**

Recommendations of sample size for exploratory factor analysis in instrument development are that there should be at least 5 cases for each item in the instrument being used<sup>34</sup>. Rasch modelling for exploratory purposes should be based on at least N=100 and preferably N=250<sup>35</sup>. For the reliability and validation study, power calculations were conducted using GPower<sup>36</sup>. Given a probability level of 0.05, an anticipated effect size of 0.5, and a desired statistical power level of 0.8, a sample size of



1  
2  
3 N=66 is required per group. A summary of the steps and the number required for each step in the  
4 analysis is provided in Table 1.  
5  
6

7 <Table 1 about here>  
8  
9

### 10 ***Inclusion and exclusion criteria***

11 Eligible patients will be those who have had an acute coronary event - namely acute coronary  
12 syndrome (ACS), acute myocardial infarction (AMI) or coronary artery bypass graft surgery (CABGS)  
13 in the previous 2 months and who are attending either a CR program or an outpatient clinic at a  
14 participating hospital. Patients who do not have adequate English language proficiency to read and  
15 understand the PICF and questionnaire will be excluded.  
16  
17

### 18 ***Participant recruitment***

19 A Research Assistant (RA) will recruit patients at two months presentation directly through  
20 outpatient clinics or CR programs associated with the investigators. Clinic staff will advise the RA of  
21 potentially eligible patients and the RA will then approach these people to ascertain eligibility and  
22 willingness to participate. Specific arrangements for site visits will be made between the RA and site  
23 investigator by email and telephone. Overall and site-specific ethical approval will be in place.  
24  
25

26 In order to calculate a response rate, the RA will document the number of patients approached and  
27 the number who agree to participate and who do not. No identifying information on either  
28 participants or non-participants will be collected.  
29

### 30 ***Data collection***

31 Consenting participants will complete the PICF and the trial-version CDI, together with basic socio-  
32 demographic and event-related information. No identifying information (name, address, date of  
33 birth) will be collected as no patient follow-up is required. For reliability and validity testing,  
34 participants will also be required to complete the four Emotion Thermometers<sup>37</sup>, the Kessler  
35 Psychological Distress Scale-6<sup>38</sup> (K6) and the PHQ-4<sup>39</sup>. In the event that the patient experiences  
36 distress while completing the questionnaire, the patient will be reminded by the RA that he/she is  
37 free to withdraw from the study (i.e., not continue with completing the questionnaire) and will be  
38 invited to contact the Australian Centre for Heart Health for a consultation with a clinical psychology  
39 specialist at no cost to the patient.  
40  
41

### 42 ***Measures***

43 In addition to the *trial-version CDI*, the following measures will be administered:  
44

45 *Demographic questionnaire*: Basic socio-demographic (e.g., age, sex, marital status, living  
46 arrangement) and cardiac event-related information (event type, date of event) will be collected.  
47

48 *Emotion Thermometers*. The Emotion Thermometers are single-item measures of distress (DT),  
49 anxiety (AnxT), depression, (DepT) and anger (AngT). They consist of a "thermometer" with  
50 numerals displayed vertically from 0 to 10. Patients rate their distress "over the last week", with 0  
51 indicating "no distress" and 10 indicating "high distress". A total score from all four mood  
52 thermometers (ETsum) indicates overall emotional problems. These thermometers, based on the  
53 NCCN cancer distress thermometer (DT)<sup>22</sup>, have been shown to be a clinically sensitive measure of  
54 distress in patients with mixed cardiovascular conditions<sup>37</sup>.  
55

56 *Patient Health Questionnaire-4*<sup>39</sup> (PHQ-4): The PHQ is a validated brief screener (4-items) for anxiety  
57 and depression, which combines the Patient Health Questionnaire-2 (PHQ-2) and the Generalized  
58 Anxiety Disorder-2 (GAD-2)<sup>39</sup>. Total scores range from 0-12, with 0 indicating "no distress" and 12  
59 indicating "severe distress".  
60

1  
2  
3 *Kessler Psychological Distress Scale-6*<sup>38</sup> (K6): The Kessler 6 is a brief measure of psychological distress  
4 which has been validated in an Australian general population<sup>38</sup>. The K6 is both an effective screening  
5 measure and an indicator of distress severity. Scores range from 6-30, with lower scores indicating  
6 higher levels of distress.  
7

8 *Screening Tool for Psychological Distress*<sup>31</sup>(STOP-D): This is a five-item, evidence-derived self-report  
9 measure generating severity scores for depression, anxiety, stress, anger and poor social support.  
10 The screening tool has been tested with patients before and after heart transplant, patients in  
11 cardiac rehabilitation and adults with congenital heart disease<sup>31</sup>.  
12

### 13 **Statistical analysis for the trial**

#### 14 **Part A – Establishing dimensions of the CDI**

15  
16 Principal component analysis (PCA) using SPSS will be used to assess the dimensions of the CDI. PCA  
17 is commonly used in the development of new instruments to provide early indications of possible  
18 dimensions before Rasch analysis is attempted<sup>40</sup>. PCA is used to extract the factors followed by  
19 oblique rotation of factors using Oblimin rotation ( $\delta = 0$ ). Kaiser's criterion, which retains eigen  
20 values above 1, will be used to guide the identification of relevant factors. A second step in the PCA  
21 is to conduct Horn's parallel analysis<sup>41</sup>, considered one of the most accurate approaches to estimate  
22 the number of components<sup>42</sup>. The size of eigen values obtained from PCA are compared with those  
23 obtained from a randomly generated data set of the same size. Only factors with eigen values  
24 exceeding the values obtained from the corresponding random data set are retained for further  
25 investigation.  
26  
27

#### 28 **Part B - Eliminating items per dimension of the CDI**

29  
30 Rasch analysis is a mathematical technique used to evaluate a latent variable not measurable  
31 directly from a set of categorical items. Rasch methods can be used to assess the extent to which  
32 individual items represent the underlying construct that an instrument intends to measure. The  
33 Rasch model chosen for this analysis, the Partial Credit Model<sup>43</sup> is applicable to polytomous rather  
34 than dichotomous data and is therefore suitable for Likert scales and response ratings.  
35

36 Rasch analysis will be conducted using RUMM2030 software (RUMM Laboratory Pty Ltd., Perth,  
37 Australia). Three statistics are considered to determine the degree of fit for each CDI scale: overall  
38 fit; individual person fit; and individual item fit<sup>44</sup>. Adequate overall fit of the CDI to the Rasch model  
39 is indicated by a non-significant Bonferroni adjusted Chi-square probability value<sup>45</sup>. Satisfactory  
40 overall item and individual fit for each scale will be determined by a fit residual standard deviation  
41 (SD) value of  $\leq 1.5$ . Individual item fit is indicated by two statistics: fit residual values; and Chi-square  
42 probability values. Item fit residual values  $-2.5$  to  $2.5$  indicate adequate fit<sup>46</sup>. Above this range  
43 (underfit) suggests deviation from the model, below (overfit) suggests that some items in the scale  
44 are similar to each other<sup>47</sup>. A perfect model fit would be reflected by residuals with a mean of 0.00  
45 and a SD of 1.00. Any mis-fitting item in terms of infit/outfit is discarded and the analysis re-run.  
46 This iterative process is continued until no further misfit is observed<sup>48</sup>. The Rasch analysis will  
47 produce the person separation index (PSI), which indicates the degree to which study participants  
48 can be differentiated into certain groups (PSI range 0–1). Values for PSI of 0.8 are acceptable<sup>49</sup>. A  
49 sample size of at least 100 patients is required to perform a Rasch analysis which can estimate an  
50 acceptable PSI value<sup>35</sup>.  
51  
52

53 Statistical significance will be considered at the 5% level and Bonferroni correction for multiple  
54 testing will be applied where appropriate.  
55

#### 56 **Psychometric properties of the final Cardiac Distress Inventory**

57 The COSMIN (Consensus-based Standards for the selection of health Measurement Instruments)  
58 criteria for evaluating the methodological quality of health-related patient-reported outcomes will  
59  
60

1  
2  
3 be used to inform the development of the methodology for determining the psychometric  
4 properties as far as possible<sup>50, 51</sup>.

### 6 **Reliability**

7 Internal consistency of the CDI will be determined using Cronbach's alpha, standard test-retest  
8 methods, and evaluation of the Person Separation Index (PSI) from the Rasch analysis.

9  
10 Test-retest reliability indicates agreement between repeated assessments. The CDI will be  
11 administered at two time points with at least 14 days separation, the first assessment taking place at  
12 least 30 days after the cardiac event or surgery. The intra-class correlation coefficient (ICC) will be  
13 used to examine the level of test-retest reliability. A 2-way analysis of variance (ANOVA) assuming  
14 patients' effects to be random, will be used to compute the variance needed to calculate the ICC. ICC  
15 values in the range of 0.6–0.8 represent substantial reliability and ICC values > 0.8 indicate high  
16 reliability<sup>52</sup>. In addition, a paired t-test will be performed to examine whether significant differences  
17 exist between test-retest assessments. A sample of at least N=66 is required for test-retesting, given  
18 an estimated effect size of 0.4, power of .90, standard deviation of 1.0 and alpha of 0.05.

### 21 **Validity**

22 Scale comparisons will be used to investigate the concurrent convergent validity of the CDI. Pearson  
23 correlation coefficients will be calculated to explore the association between CDI scores and the  
24 measure that is commonly used in clinical practice to assess distress, the six-item Kessler K6<sup>38</sup>.  
25 Subscale scores of the CDI will be compared with K6 scores where appropriate. We will assess the  
26 discriminant validity and predictive validity of the CDI by assessing whether it distinguishes between  
27 patients scoring high and low on the K6, using the Australian scoring cut-off of 19 to indicate  
28 probable serious mental illness<sup>53</sup>. Again, both CDI total and factor scores will be investigated. It is not  
29 possible to use a measure of cardiac distress for validity testing as no such measure exists.

30  
31  
32 Pearson correlation coefficients will also be calculated to explore the association between CDI scores  
33 and the Patient Health Questionnaire–4 (PHQ4)<sup>39</sup>. Normative data are available from a nationally  
34 representative face-to-face household survey sample of 5030 people, conducted in Germany in  
35 2006<sup>54</sup>. The measure has been translated and validated in Hispanic populations, for example<sup>55</sup>, and  
36 has been used in studies of cancer patients<sup>56</sup> and emergency department patients<sup>57</sup>. As far as the  
37 authors are aware, no validation study of the PHQ-4 has been undertaken with cardiac patients.

38  
39 Comparison of CDI scores will also be conducted between the various types of cardiac patients (e.g.  
40 AMI vs CABGS). Comparison of groups will be conducted via analysis of variance (ANOVA).

### 42 **Latent Class Analysis**

43 Latent class analysis (LCA) will be used in order to describe groups of participants that differ in their  
44 response patterns to the CDI. LCA explains inter-individual differences in response patterns by  
45 means of a given number of latent classes (subgroups of participants). LCA estimates the size of the  
46 classes and a membership probability for each participant within each class<sup>58</sup> and will be performed  
47 using Mplus version 6.0<sup>59</sup>. To select the most parsimonious number of classes and maximise model  
48 fit, a series of latent class models will be applied to the data. First, the simplest 1-class model (all  
49 patients are assumed to have the same pattern of cardiac distress) will be applied to the data,  
50 followed by successive models with a unitary increase in the number of latent classes (up to eight).  
51 Model solutions are evaluated on the basis of their Bayesian information criterion (BIC) and entropy.  
52 The BIC has been shown to be a robust indicator of model fit, with lower values indicative of better  
53 model fit<sup>60</sup>. BIC will be used in preference to Akaike information criteria, as the latter has been  
54 shown to over-extract classes in simulation models<sup>61</sup>. The association of CDI latent class membership  
55 with CDI scale scores, sociodemographic characteristics, diagnosis and K6 distress scores will also be  
56 examined using Mplus<sup>59</sup>. Mplus generates overall chi-square values to assess significant associations  
57 between variables as well as unadjusted chi-square values for exploratory post-hoc analysis.  
58  
59  
60

## Development of a short form Cardiac Distress Inventory for screening purposes

A shorter version of the CDI, the CDI-S, will then be created. Importantly, item reduction based on rigorous methodological guidelines is necessary to maintain validity when shortening composite measurement scales<sup>62</sup>. In addition, there are a number of ways to achieve item reduction<sup>63</sup>. In light of these two points, we will use two methods to develop the short form screening tool – a clinically oriented method and a statistically-driven method. A concept-retention approach will create a short version of the original measure by selection of the top performing item in each domain to become part of the short, concept-retention version<sup>64</sup>. Rasch analysis as used in a number of health-related item reduction exercises, will also be employed<sup>65, 66</sup>. The Rasch analysis and psychometric evaluation of the CDI-S will follow the format described by Nishigami and colleagues<sup>66</sup>. Both versions of the CDI-S will then be field tested.

### Thermometer testing

Receiver operating characteristic (ROC) analysis will be used to identify the optimal CDI scale cut off score for distinguishing whether a person experiences clinically significant distress as defined by the established cut-off thresholds for ETsum (the sum of all four mood thermometers). The Area Under the Curve (AUC) will be used to estimate the overall discriminative accuracy of the CDI scale cut off score relative to the established cut off scores of ETsum (a score >14 indicates moderate and >20 indicates severe emotional problems). Using qualitative guidelines for interpreting AUC values<sup>67</sup>, namely  $AUC \leq 0.70$  as acceptable discrimination,  $AUC \leq 0.80$  as good discrimination and  $AUC \leq 0.90$  as excellent discrimination. ROC curves will be used to show the trade-off between the sensitivity (true-positive rate) and specificity (true-negative rate) for every possible cut off score of the CDI Scale.

### TIMELINE

Months 1-2: staff recruitment, CR site recruitment and liaison; Months 3-10: Administration of the full item pool draft CDI to patients attending CR or outpatient appointments. This includes test-retest of 66 cardiac patients; Months 11-12: completion of data analysis; Months 13-15: writing up the study findings will be a continuous activity with completion in months 15-18.

### SUMMARY

Cardiac distress is a common problem among cardiac patients. Before cardiac distress can be treated effectively, it needs to be properly measured by a reliable, valid and sensitive instrument. The primary aim of the project is to develop a new clinical measure which health professionals can use to identify and assess cardiac distress. They can use the fine-grained assessment provided by this unique measure to structure psychological and emotional interventions to intervene in cases of persistent distress in patients, following a cardiac event. No such measure currently exists.

While physical recovery remains the highest priority in preventive cardiology, psychological recovery is now considered a primary concern for health professionals working in cardiac rehabilitation and secondary prevention. The prevalence of clinical anxiety and depression in people who have had a cardiac event is up to four times higher than in the general population, however both the prevalence and nature of the broader concept of cardiac-related distress remains unknown. Post-event psychological problems confer an increased mortality risk for patients, highlighting the importance of identifying distressed patients early in order to ensure appropriate treatment is received. The new CDI will not only enhance clinicians' ability to identify distressed patients but will also enable them to identify the specific nature of the distress, thereby optimising their ability to provide timely support targeted to the specific psychosocial needs of the patient. The new CDI has the potential to ensure that patients are provided with the specific support they require in their psychosocial recovery after a cardiac event and, in doing so, has the potential to improve their quality of life, enhance their behaviour change efforts and ultimately extend their survival.

## References

1. Jackson AC, Murphy BM, Thompson DR, et al. What is cardiac distress and how should we measure it? *Brit J Card Nurs* 2018; 13: 286-293.
2. Stewart RAH, Colquhoun DM, Marschner SL, et al. Persistent psychological distress and mortality in patients with stable coronary artery disease. *Heart* 2017; 103: 1860-1866.
3. Lissaker CT, Wallert J, Held C, et al. Emotional distress as a predictor of statin non-adherence among Swedish first-time myocardial infarction patients, 2006-2013. *J Psychosom Res* 2017; 97: 30-37.
4. Habibović M, Mudde L, Pedersen SS, et al. Sleep disturbance in patients with an implantable cardioverter defibrillator: Prevalence, predictors and impact on health status. *Eur J Cardiovasc Nurs* 2017; 17: 390-398.
5. Sipotz J, Friedrich O, Hofer S, et al. Health related quality of life and mental distress after PCI: restoring a state of equilibrium. *Health Qual Life Outcomes* 2013; 11: 144.
6. Gostoli S, Roncuzzi R, Urbinati S, et al. Clinical and subclinical distress, quality of life, and psychological wellbeing after cardiac rehabilitation. *App Psychol Health Wellbeing* 2017; 9: 349-369.
7. Russ TC, Stamatakis E, Hamer M, et al. Association between psychological distress and mortality: individual participant pooled analysis of 10 prospective cohort studies. *BMJ Clinical Res* 2012; 345: e4933.
8. Snaith RP and Zigmond AS. *The Hospital Anxiety and Depression Scale - Manual*. Windsor, UK: NFER-Nelson, 1994.
9. Goldberg DP and Hillier VF. A scaled version of the General Health Questionnaire. *Psychol Med* 1979; 9: 139-145.
10. Kessler RC, Andrews G, Colpe LJ, et al. Short screening scales to monitor population prevalences and trends in non-specific psychological distress. *Psychol Med* 2002; 32: 959-976.
11. Virtanen M, Elovainio M, Josefsson K, et al. Coronary heart disease and risk factors as predictors of trajectories of psychological distress from midlife to old age. *Heart* 2017; 103: 659-665.
12. Kachur S, Menezes AR, De Schutter A, et al. Significance of comorbid psychological stress and depression on outcomes after cardiac rehabilitation. *Am J Med* 2016; 129: 1316-1321.
13. Whitehead DL, Strike P, Perkins-Porras L, et al. Frequency of distress and fear of dying during acute coronary syndromes and consequences for adaptation. *Am J Cardiol* 2005; 96: 1512-1516.
14. Claesson M, Burell G, Birgander LS, et al. Psychosocial distress and impaired quality of life - targets neglected in the secondary prevention in women with ischaemic heart disease. *Eur J Cardiovasc Prev Rehab* 2003; 10: 258-266.
15. Malinauskaite I, Slapikas R, Courvoisier D, et al. The fear of dying and occurrence of posttraumatic stress symptoms after an acute coronary syndrome: A prospective observational study. *J Health Psychol* 2017; 22: 208-217.
16. Denton E-gD, Rieckmann N, Davidson KW, et al. Psychosocial vulnerabilities to depression after acute coronary syndrome: The pivotal role of rumination in predicting and maintaining depression. *Front Psychol* 2012; 3: 288.



17. Murphy BM, Higgins RO, Jackson AC, et al. Patients want to know about the 'cardiac blues'. *Aust Fam Physician* 2015; 44: 826-832.
18. Higgins RO, Murphy BM, Nicholas A, et al. Emotional and adjustment issues faced by cardiac patients seen in clinical practice: a qualitative survey of experienced clinicians. *J Cardiopulm Rehabil Prev* 2007; 27: 291-297.
19. Murphy BM, Higgins RO, Jackson AC. Anxiety, depression and psychological adjustment after an acute cardiac event. In: Alvarenga ME and Byrne D (eds) *Handbook of Psychocardiology*. Singapore: Springer, 2016.
20. Murphy BM, Elliott PC, Higgins RO, et al. Anxiety and depression after coronary artery bypass graft surgery: most get better, some get worse. *Eur J Cardiovasc Prev Rehabil* 2008; 15: 434-440.
21. Tully PJ and Baker RA. Depression, anxiety, and cardiac morbidity outcomes after coronary artery bypass surgery: a contemporary and practical review. *J Geriatr Cardiol* 2012; 9: 197-208.
22. NCCN Clinical Guidelines in Oncology. *Distress Management Version 2.2017*. National Comprehensive Cancer Network, 2017.
23. Ridner SH. Psychological distress: concept analysis. *J Adv Nurs* 2004; 45: 536-545.
24. Dennick K, Sturt J and Speight J. What is diabetes distress and how can we measure it? A narrative review and conceptual model. *J Diabet Compl* 2017; 31: 898-911.
25. Snoek FJ, Bremmer MA and Hermanns N. Constructs of depression and distress in diabetes: time for an appraisal. *Lancet Diabet Endocrin* 2015; 3: 450-460.
26. Barry V, Stout ME, Lynch ME, et al. The effect of psychological distress on health outcomes: A systematic review and meta-analysis of prospective studies. *J Health Psychol* 2019; DOI: 1359105319842931.
27. Hare DL and Davis CR. Cardiac Depression Scale: validation of a new depression scale for cardiac patients. *J Psychosom Res* 1996; 40: 379-386.
28. Bennett SJ, Puntenney PJ, Walker NL, et al. Development of an instrument to measure threat related to cardiac events. *Nurs Res* 1996; 45: 266-270.
29. Eifert GH, Thompson RN, Zvolensky MJ, et al. The cardiac anxiety questionnaire: development and preliminary validity. *Behav Res Ther* 2000; 38: 1039-1053.
30. Valenti L, Lim L, Heller RF, et al. An improved questionnaire for assessing quality of life after acute myocardial infarction. *Qual Life Res* 1996; 5: 151-161.
31. Young QR, Ignaszewski A, Fofonoff D, et al. Brief screen to identify 5 of the most common forms of psychosocial distress in cardiac patients: validation of the screening tool for psychological distress. *J Cardiovasc Nurs* 2007; 22: 525-534.
32. Pedersen SS and Andersen CM. Minding the heart: Why are we still not closer to treating depression and anxiety in clinical cardiology practice? *Eur J Prev Cardiol* 2018; 25: 244-246
33. Richards SH, Anderson L, Jenkinson CE, et al. Psychological interventions for coronary heart disease. *Cochrane Database Syst Rev* 2017; 4: Cd002902. .
34. Polit DF and Beck CT. *Essentials of Nursing Research: Appraising Evidence For Nursing Practice, 9th Edition*. Philadelphia, USA: Wolters Kluwer, 2018.

- 1
- 2
- 3
- 4 35. Chen WH, Lenderking W, Jin Y, et al. Is Rasch model analysis applicable in small sample size
- 5 pilot studies for assessing item characteristics? An example using PROMIS pain behavior item
- 6 bank data. *Qual Life Res* 2014; 23: 485-493.
- 7
- 8 36. Faul F, Erdfelder E, Buchner A, et al. Statistical power analyses using G\*Power 3.1: tests for
- 9 correlation and regression analyses. *Beh Res Methods* 2009; 41: 1149-1160.
- 10
- 11 37. Mitchell AJ, Morgan JP, Petersen D, et al. Validation of simple visual-analogue thermometer
- 12 screen for mood complications of cardiovascular disease: the Emotion Thermometers. *J Affect*
- 13 *Disord* 2012; 136: 1257-1263.
- 14
- 15 38. Furukawa TA, Kessler RC, Slade T, et al. The performance of the K6 and K10 screening scales
- 16 for psychological distress in the Australian National Survey of Mental Health and Well-Being.
- 17 *Psychol Med* 2003; 33: 357-362.
- 18
- 19 39. Kroenke K, Spitzer RL, Williams JBW, et al. An Ultra-Brief Screening Scale for Anxiety and
- 20 Depression: The PHQ-4. *Psychosomatics* 2009; 50: 613-621.
- 21
- 22 40. Tennant A, Pallant J. Unidimensionality Matters. *Rasch Measurement Transactions* 2006; 20:
- 23 1048-1051.
- 24
- 25 41. Horn JL. A rationale and test for the number of factors in factor analysis. *Psychometrika* 1965;
- 26 30: 179-185.
- 27
- 28 42. Zwick WR, Velicer WF. Comparison of five rules for determining the number of components to
- 29 retain. *Psychol Bull* 1986; 99: 432-442.
- 30
- 31 43. Masters GN. A rasch model for partial credit scoring. *Psychometrika* 1982; 47: 149-174.
- 32
- 33 44. Bell RC. Person fit and person reliability. *Educ Res Perspect* 1982; 9: 105-113.
- 34
- 35 45. Shea TL, Tennant A, Pallant JF. Rasch model analysis of the Depression, Anxiety and Stress
- 36 Scales (DASS). *BMC Psychiat* 2009; 9: 21.
- 37
- 38 46. Ramp M, Khan F, Misajon RA, et al. Rasch analysis of the Multiple Sclerosis Impact Scale MSIS-
- 39 29. *Health Qual Life Outcomes* 2009; 7: 58.
- 40
- 41 47. Sharrack B, Hughes RA, Soudain S, et al. The psychometric properties of clinical rating scales
- 42 used in multiple sclerosis. *Brain* 1999; 122: 141-159.
- 43
- 44 48. Wu M, Adams R. Applying the Rasch model to psycho-social measurement: A practical
- 45 approach. Educational Measurement Solutions, Melbourne 2007.
- 46
- 47 49. Prieto L, Alonso J and Lamarca R. Classical test theory versus rasch analysis for quality of life
- 48 questionnaire reduction. *Health Qual Life Outcomes* 2003; 1: 27.
- 49
- 50 50. Mokkink LB, Terwee CB, Knol DL, et al. The COSMIN checklist for evaluating the
- 51 methodological quality of studies on measurement properties: a clarification of its content.
- 52 *BMC Med Res Methodol* 2010; 10: 22.
- 53
- 54 51. Terwee CB, Bot SD, de Boer MR, et al. Quality criteria were proposed for measurement
- 55 properties of health status questionnaires. *J Clin Epidemiol* 2007; 60: 34-42.
- 56
- 57 52. Shrout PE and Fleiss JL. Intraclass correlations: uses in assessing rater reliability. *Psychol Bull*
- 58 1979; 86: 420-428.
- 59
- 60 53. Kessler RC, Green JG, Gruber MJ, et al. Screening for serious mental illness in the general
- population with the K6 screening scale: results from the WHO World Mental Health (WMH)
- survey initiative. *Int J Meth Psychiat Res* 2010; 19: 4-22.



- 1
  - 2
  - 3
  - 4
  - 5
  - 6
  - 7
  - 8
  - 9
  - 10
  - 11
  - 12
  - 13
  - 14
  - 15
  - 16
  - 17
  - 18
  - 19
  - 20
  - 21
  - 22
  - 23
  - 24
  - 25
  - 26
  - 27
  - 28
  - 29
  - 30
  - 31
  - 32
  - 33
  - 34
  - 35
  - 36
  - 37
  - 38
  - 39
  - 40
  - 41
  - 42
  - 43
  - 44
  - 45
  - 46
  - 47
  - 48
  - 49
  - 50
  - 51
  - 52
  - 53
  - 54
  - 55
  - 56
  - 57
  - 58
  - 59
  - 60
54. Löwe B, Wahl I, Rose M, et al. A 4-item measure of depression and anxiety: Validation and standardization of the Patient Health Questionnaire-4 (PHQ-4) in the general population. *J Affect Dis* 2010; 122: 86-95.
55. Kocalevent R-D, Finck C, Jimenez-Leal W, et al. Standardization of the Colombian version of the PHQ-4 in the general population. *BMC Psychiat* 2014; 14: 205-205.
56. Nipp RD, El-Jawahri A, Moran SM, et al. The relationship between physical and psychological symptoms and health care utilization in hospitalized patients with advanced cancer. *Cancer* 2017; 123: 4720-4727.
57. Faessler L, Kutz A, Haubitz S, et al. Psychological distress in medical patients 30 days following an emergency department admission: results from a prospective, observational study. *BMC Emerg Med* 2016; 16: 33-33.
58. Lanza ST, Rhoades BL. Latent class analysis: an alternative perspective on subgroup analysis in prevention and treatment. *Prev Sci* 2013; 14: 157-168.
59. MPLUS (Version 6.11). Los Angeles, Calif: Muthen & Muthen.
60. D'Unger AV, Land KC, McCall PL, et al. How many latent classes of delinquent/criminal careers? Results from mixed Poisson regression analyses. *Am J Sociol* 1998; 103: 1593-1630.
61. Nylund KL, Asparouhov T and Muthén BO. Deciding on the number of classes in latent class analysis and growth mixture modeling: A Monte Carlo simulation study. *Struct Equat Modeling* 2007; 14: 535-569.
62. Goetz C, Coste J, Lemetayer F, et al. Item reduction based on rigorous methodological guidelines is necessary to maintain validity when shortening composite measurement scales. *J Clin Epidemiol* 2013; 66: 710-718.
63. Coste J, Guillemin F, Pouchot J, et al. Methodological approaches to shortening composite measurement scales. *J Clin Epidemiol* 1997; 50: 247-252.
64. Beaton DE, Wright JG, Katz JN, et al. Development of the QuickDASH: Comparison of three item-reduction approaches. *J Bone Joint Surg* 2005; 87-A: 1038-1046.
65. Las Hayas C, Quintana JM, Padierna JA, et al. Use of Rasch methodology to develop a short version of the health related quality of life for eating disorders questionnaire: a prospective study. *Health Qual Life Outcomes* 2010; 8: 29-29.
66. Nishigami T, Tanaka K, Mibu A, et al. Development and psychometric properties of short form of central sensitization inventory in participants with musculoskeletal pain: A cross-sectional study. *PLOS ONE* 2018; 13: e0200152.
67. Hosmer D, Lemeshow S. Applied Logistic Regression. Wiley-Interscience: New York. 2000.
68. Koo TK, Li MY. A Guideline of selecting and reporting intraclass correlation coefficients for reliability research. *J Chiropract Med* 2016; 15: 155-163.
69. Chan DS, Chau JP, Chang AM. Acute coronary syndromes: cardiac rehabilitation programmes and quality of life *J Adv Nurs* 2005; 49: 591-599.

1  
2  
3 **Authors contributions:** AJ drafted the article with MLG drafting the psychometric testing  
4 component. MR, MLG, DR, CS, MA, JA, RO, MR, BM made contributions to the resulting draft. All  
5 authors approved the final version.  
6

7 **Funding:** This project received no specific grant from any funding agency in the public, commercial  
8 or not-for-profit sectors.  
9

10 **Competing interests:** All authors declare that they have no competing interests.  
11

12 **Acknowledgements:** The authors would like to thank the patients and patient support groups who  
13 assisted in the development of the CDI version for testing. They would also like to acknowledge the  
14 generous posthumous gift by Ms Angela Anita Reid to the Australian Centre for Heart Health which  
15 is funding this project.  
16  
17  
18  
19  
20  
21  
22  
23  
24  
25  
26  
27  
28  
29  
30  
31  
32  
33  
34  
35  
36  
37  
38  
39  
40  
41  
42  
43  
44  
45  
46  
47  
48  
49  
50  
51  
52  
53  
54  
55  
56  
57  
58  
59  
60

For peer review only

Table 1: Numbers required for each stage of the development and testing of the Cardiac Distress Inventory

| Steps                       | Purpose                                                    | N required with rationale                                                                                                                                                                                                                                                                                                                                                                                                                                                                                                                                                                                                                                                                                                                                                                                                                                                                                                                                                                                                                                                                                                        |
|-----------------------------|------------------------------------------------------------|----------------------------------------------------------------------------------------------------------------------------------------------------------------------------------------------------------------------------------------------------------------------------------------------------------------------------------------------------------------------------------------------------------------------------------------------------------------------------------------------------------------------------------------------------------------------------------------------------------------------------------------------------------------------------------------------------------------------------------------------------------------------------------------------------------------------------------------------------------------------------------------------------------------------------------------------------------------------------------------------------------------------------------------------------------------------------------------------------------------------------------|
| <i>Development</i>          |                                                            |                                                                                                                                                                                                                                                                                                                                                                                                                                                                                                                                                                                                                                                                                                                                                                                                                                                                                                                                                                                                                                                                                                                                  |
| Exploratory Factor Analysis | Establish number of dimensions                             | (74 items X 5=370) cardiac patients (AMI, AF, CABGS, unstable angina plus heart failure patients with New York Heart Association (NYHA) classification of mild (NYHA 11) or moderate (NYHA 111) heart failure. Allowing for 10 percent missing data, a sample size of (74 items X 5=370 + 10% = 407) would therefore be required for this phase of the study.                                                                                                                                                                                                                                                                                                                                                                                                                                                                                                                                                                                                                                                                                                                                                                    |
| Rasch Analysis              | Eliminate items per dimension                              | The Rasch Analysis will utilise the total baseline sample and will not require a sub-sample.                                                                                                                                                                                                                                                                                                                                                                                                                                                                                                                                                                                                                                                                                                                                                                                                                                                                                                                                                                                                                                     |
| <i>Testing</i>              |                                                            |                                                                                                                                                                                                                                                                                                                                                                                                                                                                                                                                                                                                                                                                                                                                                                                                                                                                                                                                                                                                                                                                                                                                  |
| Test-Retest reliability     | Establish reliability                                      | Relative reliability will be calculated using the intraclass correlation coefficient (ICC), with 95% confidence interval based on a mean-rating (k = 2), absolute-agreement, two-way mixed-effects model <sup>68</sup> . The ICC is interpreted according to the following criteria: values below 0.5 indicated low reliability, values between 0.5 and 0.75 indicated moderate reliability, values between 0.75 and 0.9 indicated good reliability, and values greater than 0.90 indicated excellent reliability, as suggested by Koo et al. <sup>68</sup> . Given an expected ICC of 0.80, a conservative 95% CI of ICC of 0.1, and alpha of 0.05, a sample size of 201 is required. Given an expected attrition rate of 20%, a total sample of N=252 from the baseline sample is required for test-retesting. This attrition rate is compatible with rates obtained in previous studies of cardiac rehabilitation (CR) participants tested at two time points <sup>69</sup> and is a conservative estimate given the duration between testing in this study is much shorter, at 14 days. This step uses reduced item version. |
| Construct validity          |                                                            | 66 cardiac patients administered both the CDI and K6. (Using the reduced item version of the CDI).                                                                                                                                                                                                                                                                                                                                                                                                                                                                                                                                                                                                                                                                                                                                                                                                                                                                                                                                                                                                                               |
| Latent Class Analysis       | Identify inter-individual differences in response patterns | The LCA analysis will utilise the total baseline sample and will not require a sub-sample.                                                                                                                                                                                                                                                                                                                                                                                                                                                                                                                                                                                                                                                                                                                                                                                                                                                                                                                                                                                                                                       |

# BMJ Open

## Protocol for the development and validation of a measure of persistent psychological and emotional distress in cardiac patients: The Cardiac Distress Inventory

|                                 |                                                                                                                                                                                                                                                                                                                                                                                                                                                                                                                                                                                                                                                                                                                                                                                                                                                                                                                                                                                                                                                     |
|---------------------------------|-----------------------------------------------------------------------------------------------------------------------------------------------------------------------------------------------------------------------------------------------------------------------------------------------------------------------------------------------------------------------------------------------------------------------------------------------------------------------------------------------------------------------------------------------------------------------------------------------------------------------------------------------------------------------------------------------------------------------------------------------------------------------------------------------------------------------------------------------------------------------------------------------------------------------------------------------------------------------------------------------------------------------------------------------------|
| Journal:                        | <i>BMJ Open</i>                                                                                                                                                                                                                                                                                                                                                                                                                                                                                                                                                                                                                                                                                                                                                                                                                                                                                                                                                                                                                                     |
| Manuscript ID                   | bmjopen-2019-034946.R1                                                                                                                                                                                                                                                                                                                                                                                                                                                                                                                                                                                                                                                                                                                                                                                                                                                                                                                                                                                                                              |
| Article Type:                   | Protocol                                                                                                                                                                                                                                                                                                                                                                                                                                                                                                                                                                                                                                                                                                                                                                                                                                                                                                                                                                                                                                            |
| Date Submitted by the Author:   | 03-Apr-2020                                                                                                                                                                                                                                                                                                                                                                                                                                                                                                                                                                                                                                                                                                                                                                                                                                                                                                                                                                                                                                         |
| Complete List of Authors:       | Jackson, Alun; Australian Centre for Heart Health,; Deakin University Faculty of Health<br>Rogerson, Michelle; Australian Centre for Heart Health<br>Le Grande , Michael; Australian Centre for Heart Health; University of Melbourne, Centre for Behaviour Change, Melbourne School of Psychological Sciences<br>Thompson, David; Queen's University Belfast, School of Nursing and Midwifery; Australian Centre for Heart Health<br>Ski, Chantal; Queen's University, Belfast, School of Nursing and Midwifery; Australian Centre for Heart Health<br>Alvarenga, Marlies; Federation University Australia - Berwick Campus, School of Health and Life Sciences; MonashHeart, Monash Cardiovascular Research Centre<br>Amerena, John; Barwon Health, Cardiac Services; Deakin School of Medicine<br>Higgins, Rosemary; Australian Centre for Heart Health; Deakin University, Faculty of Health<br>Raciti, Michela; Australian Centre for Heart Health<br>Murphy, Barbara; Australian Centre for Heart Health; Deakin University Faculty of Health |
| <b>Primary Subject Heading</b>: | Cardiovascular medicine                                                                                                                                                                                                                                                                                                                                                                                                                                                                                                                                                                                                                                                                                                                                                                                                                                                                                                                                                                                                                             |
| Secondary Subject Heading:      | Mental health                                                                                                                                                                                                                                                                                                                                                                                                                                                                                                                                                                                                                                                                                                                                                                                                                                                                                                                                                                                                                                       |
| Keywords:                       | Adult cardiology < CARDIOLOGY, Protocols & guidelines < HEALTH SERVICES ADMINISTRATION & MANAGEMENT, Cardiology < INTERNAL MEDICINE, MENTAL HEALTH                                                                                                                                                                                                                                                                                                                                                                                                                                                                                                                                                                                                                                                                                                                                                                                                                                                                                                  |
|                                 |                                                                                                                                                                                                                                                                                                                                                                                                                                                                                                                                                                                                                                                                                                                                                                                                                                                                                                                                                                                                                                                     |

SCHOLARONE™  
Manuscripts

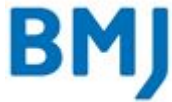

I, the Submitting Author has the right to grant and does grant on behalf of all authors of the Work (as defined in the below author licence), an exclusive licence and/or a non-exclusive licence for contributions from authors who are: i) UK Crown employees; ii) where BMJ has agreed a CC-BY licence shall apply, and/or iii) in accordance with the terms applicable for US Federal Government officers or employees acting as part of their official duties; on a worldwide, perpetual, irrevocable, royalty-free basis to BMJ Publishing Group Ltd ("BMJ") its licensees and where the relevant Journal is co-owned by BMJ to the co-owners of the Journal, to publish the Work in this journal and any other BMJ products and to exploit all rights, as set out in our [licence](#).

The Submitting Author accepts and understands that any supply made under these terms is made by BMJ to the Submitting Author unless you are acting as an employee on behalf of your employer or a postgraduate student of an affiliated institution which is paying any applicable article publishing charge ("APC") for Open Access articles. Where the Submitting Author wishes to make the Work available on an Open Access basis (and intends to pay the relevant APC), the terms of reuse of such Open Access shall be governed by a Creative Commons licence – details of these licences and which [Creative Commons](#) licence will apply to this Work are set out in our licence referred to above.

Other than as permitted in any relevant BMJ Author's Self Archiving Policies, I confirm this Work has not been accepted for publication elsewhere, is not being considered for publication elsewhere and does not duplicate material already published. I confirm all authors consent to publication of this Work and authorise the granting of this licence.

1  
2  
3 **Protocol for the development and validation of a measure of persistent psychological and**  
4 **emotional distress in cardiac patients: The Cardiac Distress Inventory**  
5  
6  
7

8 **Alun C Jackson** PhD (Corresponding author), Director, Australian Centre for Heart Health,  
9 Melbourne, Victoria, Australia; Honorary Professor, Faculty of Health, Deakin University, Geelong,  
10 Australia; Honorary Professor, Centre on Behavioural Health, University of Hong Kong, Pokfulam,  
11 Hong Kong. Address: PO Box 2137, The Royal Melbourne Hospital, Victoria 3050 Australia; Ph: +61 3  
12 9326 8544; Email: [alun.jackson@australianhearthealth.org.au](mailto:alun.jackson@australianhearthealth.org.au)  
13  
14

15 **Michelle Rogerson** PhD, Research Fellow, Australian Centre for Heart Health, Melbourne, Australia.  
16

17 **Michael R Le Grande** MPH, Senior Research Fellow, Australian Centre for Heart Health, Melbourne,  
18 Australia; Research Fellow, Centre for Behaviour Change, Melbourne School of Psychological  
19 Sciences, University of Melbourne, Melbourne, Australia.  
20

21 **David R Thompson** PhD, Professor, School of Nursing and Midwifery, Queen's University Belfast, UK;  
22 Honorary Professorial Fellow, Australian Centre for Heart Health, Melbourne, Australia; Honorary  
23 Professor, Department of Psychiatry, University of Melbourne, Melbourne, Australia.  
24

25 **Chantal F Ski** PhD, Reader, School of Nursing and Midwifery, Queen's University Belfast, UK;  
26 Honorary Principal Research Fellow, Australian Centre for Heart Health, Melbourne, Australia;  
27 Honorary Associate Professor, Department of Psychiatry, University of Melbourne, Melbourne,  
28 Australia.  
29

30  
31 **Marlies E Alvarenga** PhD, Lecturer in Psychology, School of Health and Life Sciences, Federation  
32 University Australia, Berwick, Australia; Consultant Clinical Psychologist, Monash Cardiovascular  
33 Research Centre, MonashHEART, Melbourne, Australia & Monash Health & Department of Medicine,  
34 Monash University, Melbourne, Australia & Australian Centre for Heart Health, Melbourne, Australia  
35

36  
37 **John Amerena** MB BS, Director of Cardiac Services, Barwon Health, Geelong, Australia; Clinical  
38 Associate Professor, Deakin School of Medicine, University Hospital Geelong, Geelong, Australia.  
39

40 **Rosemary O Higgins** DPsych, Clinical Consultant (Health Psychology), Australian Centre for Heart  
41 Health, Melbourne, Australia; Honorary Associate Professor, Department of Psychology, Deakin  
42 University, Geelong, Australia; Honorary Associate Professor, Department of Physiotherapy,  
43 University of Melbourne, Melbourne, Australia.  
44

45 **Michela Raciti** BPsych, Research Intern, Australian Centre for Heart Health, Melbourne, Australia  
46

47 **Barbara M Murphy** PhD, Principal Researcher, Australian Centre for Heart Health, Melbourne,  
48 Australia; Honorary Associate Professor, Faculty of Health, Deakin University, Geelong, Australia;  
49 Honorary Senior Research Fellow, Department of Psychology, University of Melbourne, Melbourne,  
50 Australia.  
51

52 **Key words:** cardiac distress, anxiety, depression, psychometrics, instrument development  
53

54 **Word count:** 4371  
55  
56  
57  
58  
59  
60

## ABSTRACT

**Introduction** Distress is experienced by the majority of cardiac patients, yet no cardiac-specific measure of distress exists. The aim of this project is to develop and validate the *Cardiac Distress Inventory* (CDI). Using the CDI, health professionals will be able to identify key clusters of psychological, emotional and social concern to address with patients, post-cardiac event.

**Methods and analysis** An item pool will be generated through: identification of items by a multidisciplinary group of clinician researchers; review of generic and condition-specific distress measures; focus group testing with cardiac rehab professionals; feedback from patients. The COSMIN criteria will be used to inform the development of the methodology for determining the CDI's psychometric properties. The item pool will be tested with 400 cardiac patients and responses subjected to exploratory factor analysis, Rasch analysis, construct validity testing, and latent class analysis. ROC analysis will be used to identify the optimal CDI cut off score for distinguishing whether a person experiences clinically significant distress.

**Ethics and dissemination** Approved by the Monash Health Human Research Ethics Committee (Approval number – RES-19-0000631L-55979 0). The CDI will be made available to clinicians and researchers without charge. The CDI will be translated for use internationally. Study findings will be shared with cardiac patient support groups; academic and medical communities via publications and presentations; in the training of cardiac secondary prevention professionals; and in reports to funders. Authorship for publications will follow the Uniform Requirements for Manuscripts Submitted to Biomedical Journals.

### Strengths and limitations

- This will be the first available cardiac-specific distress measure based on a multidisciplinary conceptualisation of the core construct
- It builds on scale development in oncology and diabetes
- It will be developed using co-design principles.
- It will compare a clinically-driven and a statistically-driven method of developing a short-form of the measure for use as a screening tool



## BACKGROUND

### Conceptualisation of cardiac distress

As high prevalence conditions, much attention has been paid to the measurement and understanding of anxiety and depression as consequences of cardiac events. However, less attention has been given to the phenomenon of 'cardiac distress' which many patients experience after acute coronary events such as myocardial infarction (AMI), unstable angina, or coronary artery bypass graft surgery (CABGS). In an earlier paper, we discussed the conceptualisation of cardiac distress and defined it as:

"a persistent negative emotional state rather than a transient state; involving multiple psychosocial domains; that challenges a patient's capacity to cope with living with their heart condition, the treatment of the condition, and the resultant changes to daily living; and challenges the person's sense of self and future orientation"<sup>1</sup>.

A number of previous studies have attempted to examine the relationship between post-cardiac event distress, symptom severity and mortality in relation to a range of specific heart conditions<sup>2,3</sup> and procedures<sup>4,5</sup>, following cardiac rehabilitation<sup>6</sup>, and in cardiovascular disease more generally<sup>7</sup>. A common characteristic of these studies, however, is the use of terms such as 'distress' without explicit definition. In some cases, distress is simply defined as being that which is measured by an instrument deemed to measure distress such as the Hospital Anxiety and Depression Scale<sup>8</sup>, the General Health Questionnaire<sup>9</sup> or the Kessler Psychological Distress Scale<sup>10</sup>. Typically, these studies view psychological or emotional distress as a simple combination of anxiety and depression, as does a recent analysis of post-cardiac event psychological distress trajectories<sup>11</sup>.

A small number of studies of cardiac patients, however, widen this narrow view of distress by adding other psychosocial constructs to 'anxiety plus depression', including stress and stressful life events<sup>12-14</sup>; fear of death<sup>13,15</sup>; hostility<sup>12</sup>; vital exhaustion and reduced quality of life<sup>14</sup>; vulnerabilities such as lack of pleasant events, dysfunctional attitudes, role transitions and poor dyadic adjustment<sup>16</sup>; feelings of helplessness, loss of control, and pain<sup>15</sup>; and psychological wellbeing<sup>6</sup>. In other chronic conditions such as cancer, diabetes and rheumatic conditions, fear of disease progression has also been identified as an important reason for distress<sup>17</sup>. This future-oriented component of distress is expressed in an extreme form in cardiac-induced post-traumatic stress disorder (CDI-PTSD) with Vilchinsky and colleagues noting that fear of death dominates the experience of patients with CDI-PTSD<sup>18</sup>.

Traumatic components of a cardiac event are the abruptness of the event, the risk of death, and a strong sense of loss of control and helplessness during the event<sup>18</sup>. These reactions, coupled with the experience of surgery can lead to significant anxiety associated with death or recurrence, as well as anger, sadness and grief<sup>19</sup>, all symptoms associated with PTSD<sup>20,21</sup>. Differentiating distress from cardiac disease induced-PTSD (CDI-PTSD), however, are a range of additional psychosocial factors such as challenges to people's coping with daily living, the impact of social isolation, role transitions and challenges, and cognitive issues.

### The 'cardiac blues'

A broader approach to understanding the complexity of the psychological and emotional impacts of a cardiac event is evidenced in the concept of the 'cardiac blues' which describes a range of emotional responses to an acute cardiac event. It has been suggested that almost all patients experience at least some symptoms of the cardiac blues at the time of, or soon after, an acute cardiac event<sup>22</sup>. Common emotions include shock, low or fluctuating mood, sadness, worry, guilt and anger. Mood changes are displayed by tiredness, irritability, tearfulness, loss of pleasure in usual activities, withdrawal from others, early waking and other sleep disturbance, and changes in appetite and sex drive. Cognitive changes that typically co-occur include confusion and forgetfulness, inability to concentrate, nightmares, reduced self-esteem, concerns about role changes, particularly

1  
2  
3 regarding paid work, physical health and independence; and pessimism about the future<sup>22-24</sup>.  
4 Although generally a transient condition<sup>25, 26</sup>, if the cardiac blues does not resolve within around two  
5 months of the cardiac event, the psychological and emotional impact of the event can result in  
6 persistent cardiac distress<sup>23, 24</sup>.  
7

### 8 **Measuring condition-specific distress**

9  
10 Both the oncology and diabetes fields have at least a two decade-long history of screening and  
11 psychosocial intervention for condition-specific distress. For oncology, this is reflected in the  
12 National Comprehensive Cancer Network Guidelines for Distress Management<sup>27</sup> where distress is  
13 considered to be a multifactorial unpleasant experience of a psychological (i.e., emotional,  
14 behavioural, cognitive), social, spiritual, and/or physical nature that may interfere with the ability to  
15 cope effectively with cancer, its physical symptoms or its treatment. An excellent earlier attempt to  
16 conceptualise diabetes distress so that it could be recognised and addressed in nursing practice<sup>28</sup>,  
17 has recently been extended by Dennick and colleagues<sup>29</sup>. They characterise distress as a range of  
18 negative emotional responses, such as worry, fear, frustration, guilt, sadness, anger, to aspects of  
19 living with and managing the condition, balanced against an appraisal of available coping  
20 resources<sup>29</sup>. Snoek and colleagues argue that diabetes-distress and depression are correlated and  
21 overlapping constructs, but are not interchangeable, and that distinguishing between them is an  
22 important factor in shaping appropriate mental health interventions<sup>30</sup>. In a recent systematic review  
23 of the impact of distress on health-related outcomes, Barry and colleagues agree also that distress is  
24 distinct from depression and should be assessed using condition-specific measures, as early as  
25 practicable in treatment<sup>31</sup>.  
26  
27

### 28 **Cardiac-specific measures of the psychosocial impact of cardiac events**

29  
30 The cardiac field also has a two decade-long history of attempts to measure specific aspects of the  
31 psychological and emotional impact of cardiac events. Examples of cardiac-specific measures  
32 include the Cardiac Depression Scale<sup>32</sup>, the Cardiac Event Threat Questionnaire<sup>33</sup>, the Cardiac  
33 Anxiety Questionnaire<sup>34</sup>, the MacNew Quality of Life measure<sup>35</sup>, the Screening Tool for Psychological  
34 Distress (STOP-D)<sup>36</sup>, the Myocardial Infarction Dimensional Assessment Scale (MIDAS)<sup>37</sup>, and the  
35 European Society of Cardiology (ESC) brief (15-item) screen of psychosocial risk factors for cardiac  
36 patients<sup>38</sup>. These measures collectively assess a range of features associated with cardiac distress  
37 such as impaired quality of life, anxiety, depression, fear, death anxiety, illness-related dependency,  
38 feeling unable to cope, work and family stress, worrying levels of pain, social isolation and low  
39 perceived social support, anger and Type D personality. However, there remains no single  
40 comprehensive assessment of cardiac distress as we have defined it<sup>1</sup>. While the Joint ESC Guidelines  
41 psychosocial screen is an excellent start in this regard<sup>39</sup>, and provide an indicator for a health  
42 professional that psychosocial support is warranted, a measure is needed that enables a cardiac  
43 psychology professional to clearly identify priority areas in order to offer a timely tailored  
44 intervention for a distressed patient<sup>40, 41</sup>. Using the *Cardiac Distress Inventory* (CDI), health  
45 professionals will be able to identify key clusters of psychological, emotional and social concern to  
46 address with patients, post-cardiac event at a depth not afforded by one or two questions per  
47 construct as in the ESC core questions for the assessment of psychosocial risk factors in clinical  
48 practice<sup>39</sup>. For good clinical intervention, we need to know not just that people are anxious, but they  
49 are anxious about. Similarly, what is it that they fear: death, loss of function, loss of role, loss of  
50 intimacy? Achieving this degree of granularity to guide intervention is the point of the Cardiac  
51 Distress inventory.  
52  
53  
54

### 55 **Aims**

56 The aims of the present study are:

- 57 1. To develop and validate the Cardiac Distress Inventory (CDI).
- 58 2. To develop a short form screening tool version of the CDI.
- 59
- 60

This protocol has been approved by the Monash Health Human Research Ethics Committee (Approval number – RES-19-0000631L-55979 0)

## METHOD

The method described in this protocol for development and validation of the CDI conforms, we believe, to the ‘best practices’ for undertaking such a task, outlined by Boateng and colleagues<sup>42</sup>.

### Item generation

There are six steps in the item generation procedure:

- i. Initial generation of items by a multidisciplinary group of researchers and clinicians including the disciplines of nursing, psychiatry, behavioural health, psychology and cardiology.
- ii. Review of generic and condition-specific distress measures, to identify the elements comprising the construct of ‘distress’ in those measures and to identify items which could be adapted for the CDI.
- iii. Review of cardiac-specific measures incorporating elements of distress as defined by the present authors<sup>1</sup>.
- iv. Review of items for appropriateness for a post-operative cardiac population by the multidisciplinary investigator group.
- v. Focus group testing with two multidisciplinary groups of cardiac rehabilitation professionals: experienced practitioners undertaking intensive training in cardiac rehabilitation through the Australian Centre for Heart Health; and the National Executive of the Australian Cardiovascular Health and Rehabilitation Association (ACRA).
- vi. Consultation with, and feedback from, cardiac patients (key informants) on the structure and content of the CDI.

Consistent with the approach taken to the PROMIS item bank development and testing<sup>43</sup>, and our prior conceptualisation of the primary construct of cardiac distress as a multifactorial construct, we expect that the CDI will be a multidimensional measure incorporating emotional, belief, behavioural, cognitive and social domains<sup>1</sup>

### Patient and public involvement

The need for a comprehensive measure of cardiac-related distress has been identified by the multidisciplinary clinician researcher members of the CDI development group, through their clinical practice in provision of psychosocial support to cardiac patients. This need has been endorsed by the authors’ consultations with both individual patients and patient support groups such as the hospital-based or regionally-based Heart Beat programs such as Heart Beat Victoria. As evident from step vi in the item generation procedure, patients will be consulted as key informants about the structure and content of the CDI. Only after this process of consultation is complete will the CDI item pool be tested with 400 cardiac patients.

The result of the CDI development project, the psychometrically sound *Cardiac Distress Inventory*, will be made available to clinicians and researchers without charge, but with a request that data collected in studies using the measure will be made available for aggregation and analysis in future. The CDI will also be translated for use with clinical populations internationally with reporting of the psychometric properties of those versions. Confirmed translations will be Italian, Hebrew, Arabic, Farsi, and Spanish. Methods for translation vary<sup>44, 45</sup> but we will adopt the following strategy. The CDI will be translated independently by two bilingual cardiac psychologist clinician / researchers. These translations will then be back translated into English by a bilingual psychologist independent of the two original translators and not familiar with the CDI study. These back translations will be reviewed

by a subgroup of the investigators. Discrepancies will be resolved by consensus between the original translators and the review subgroup.

Study findings will be shared with community members, particularly cardiac patient support groups such as the Heart Beat groups and their equivalents internationally; academic and medical communities via publications and presentations; in an online course in its rationale and use provided at no cost by the Australian Centre for Heart Health. The short form will be made available on the website of the Australian Centre for Heart Health for completion by patients to self-screen with suggestions for follow up psychological support where indicated.

### Cardiac Distress Inventory design

Items generated through the process outlined above will be reworded where appropriate to ensure relevance to the measurement of cardiac distress, and appropriateness of fit with the following instruction and response set:

*Living with a heart condition can sometimes be difficult. Listed below are some issues that people living with a heart condition may experience.*

*Please indicate whether or not you have experienced each issue during the past four weeks by checking 'Yes' or 'No'. For each item you have checked 'Yes', indicate how much distress this issue has caused you for the past four weeks, from 0 to 3, where "0" is no distress and "3" is severe distress.*

| Issue                                             | Yes                   | No                    | If yes, indicate how much distress this causes for you |                 |                   |                 |
|---------------------------------------------------|-----------------------|-----------------------|--------------------------------------------------------|-----------------|-------------------|-----------------|
|                                                   |                       |                       | No distress at all                                     | Slight distress | Moderate distress | Severe distress |
| Example: Having more pain than I expected to have | <input type="radio"/> | <input type="radio"/> | 0                                                      | 1               | 2                 | 3               |

### Trialling of the questionnaire for item reduction

#### **Sample size required for trial**

Recommendations of sample size for exploratory factor analysis in instrument development are that there should be at least 5 cases for each item in the instrument being used<sup>46</sup>. Rasch modelling for exploratory purposes should be based on at least N=100 and preferably N=250<sup>47</sup>. For the reliability and validation study, power calculations were conducted using GPower<sup>48</sup>. Given a probability level of 0.05, an anticipated effect size of 0.5, and a desired statistical power level of 0.8, a sample size of N=66 is required per group. A summary of the steps and the number required for each step in the analysis is provided in Table 1.

<Table 1 about here>

#### **Inclusion and exclusion criteria**

Eligible patients will be those who have had an acute coronary event - namely acute coronary syndrome (ACS), acute myocardial infarction (AMI) or coronary artery bypass graft surgery (CABGS) in the previous 6 months and who are attending either a CR program or an outpatient clinic at a participating hospital. Patients who do not have adequate English language proficiency to read and understand the PICF and questionnaire will be excluded.

#### **Participant recruitment**

1  
2  
3 A Research Assistant (RA) will recruit patients at two months presentation directly through  
4 outpatient clinics or CR programs associated with the investigators. Clinic staff will advise the RA of  
5 potentially eligible patients and the RA will then approach these people to ascertain eligibility and  
6 willingness to participate. Specific arrangements for site visits will be made between the RA and site  
7 investigator by email and telephone. Overall and site-specific ethical approval will be in place.  
8

9 In order to calculate a response rate, the RA will document the number of patients approached and  
10 the number who agree to participate and who do not. No identifying information on either  
11 participants or non-participants will be collected.  
12

### 13 **Data collection**

14 Consenting participants will complete the PICF and the trial-version CDI, together with basic socio-  
15 demographic and event-related information. No identifying information (name, address, date of  
16 birth) will be collected as no patient follow-up is required. For reliability and validity testing,  
17 participants will also be required to complete the four Emotion Thermometers<sup>49</sup>, the Kessler  
18 Psychological Distress Scale-6<sup>50</sup> (K6) and the PHQ-4<sup>51</sup>. In the event that the patient experiences  
19 distress while completing the questionnaire, the patient will be reminded by the RA that he/she is  
20 free to withdraw from the study (i.e., not continue with completing the questionnaire) and will be  
21 invited to contact the Australian Centre for Heart Health for a consultation with a clinical psychology  
22 specialist at no cost to the patient.  
23  
24

### 25 **Measures**

26 In addition to the *trial-version CDI*, the following measures will be administered:  
27

28 *Demographic questionnaire*: Basic socio-demographic (e.g., age, sex, marital status, living  
29 arrangement) and cardiac event-related information (event type, date of event) will be collected.  
30

31 *Emotion Thermometers*. The Emotion Thermometers are single-item measures of distress (DT),  
32 anxiety (AnxT), depression, (DepT) and anger (AngT). They consist of a “thermometer” with  
33 numerals displayed vertically from 0 to 10. Patients rate their distress “over the last week”, with 0  
34 indicating “no distress” and 10 indicating “high distress”. A total score from all four mood  
35 thermometers (ETsum) indicates overall emotional problems. These thermometers, based on the  
36 NCCN cancer distress thermometer (DT)<sup>27</sup>, have been shown to be a clinically sensitive measure of  
37 distress in patients with mixed cardiovascular conditions<sup>49</sup>.  
38

39 *Patient Health Questionnaire-4*<sup>51</sup> (PHQ-4): The PHQ is a validated brief screener (4-items) for anxiety  
40 and depression, which combines the Patient Health Questionnaire-2 (PHQ-2) and the Generalized  
41 Anxiety Disorder-2 (GAD-2)<sup>51</sup>. Total scores range from 0-12, with 0 indicating “no distress” and 12  
42 indicating “severe distress”.  
43

44 *Kessler Psychological Distress Scale-6*<sup>50</sup> (K6): The Kessler 6 is a brief measure of psychological distress  
45 which has been validated in an Australian general population<sup>50</sup>. The K6 is both an effective screening  
46 measure and an indicator of distress severity. Scores range from 6-30, with lower scores indicating  
47 higher levels of distress.  
48

49 *Screening Tool for Psychological Distress*<sup>36</sup> (STOP-D): This is a five-item, evidence-derived self-report  
50 measure generating severity scores for depression, anxiety, stress, anger and poor social support.  
51 The screening tool has been tested with patients before and after heart transplant, patients in  
52 cardiac rehabilitation and adults with congenital heart disease<sup>36</sup>.  
53

### 54 **Statistical analysis for the trial**

#### 55 **Part A – Establishing dimensions of the CDI**

56 Principal component analysis (PCA) using SPSS will be used to assess the dimensions of the CDI. PCA  
57 is commonly used in the development of new instruments to provide early indications of possible  
58 dimensions before Rasch analysis is attempted<sup>52</sup>. PCA is used to extract the factors followed by  
59  
60



1  
2  
3 oblique rotation of factors using Oblimin rotation ( $\delta = 0$ ). Kaiser's criterion, which retains eigen  
4 values above 1, will be used to guide the identification of relevant factors. A second step in the PCA  
5 is to conduct Horn's parallel analysis<sup>53</sup>, considered one of the most accurate approaches to estimate  
6 the number of components<sup>54</sup>. The size of eigen values obtained from PCA are compared with those  
7 obtained from a randomly generated data set of the same size. Only factors with eigen values  
8 exceeding the values obtained from the corresponding random data set are retained for further  
9 investigation.

### 11 **Part B - Eliminating items per dimension of the CDI**

12  
13 Rasch analysis is a mathematical technique used to evaluate a latent variable not measurable  
14 directly from a set of categorical items. Rasch methods can be used to assess the extent to which  
15 individual items represent the underlying construct that an instrument intends to measure. The  
16 Rasch model chosen for this analysis, the Partial Credit Model<sup>55</sup> is applicable to polytomous rather  
17 than dichotomous data and is therefore suitable for Likert scales and response ratings.

18  
19 Rasch analysis will be conducted using RUMM2030 software (RUMM Laboratory Pty Ltd., Perth,  
20 Australia). Three statistics are considered to determine the degree of fit for each CDI scale: overall  
21 fit; individual person fit; and individual item fit<sup>56</sup>. Adequate overall fit of the CDI to the Rasch model  
22 is indicated by a non-significant Bonferroni adjusted Chi-square probability value<sup>57</sup>. Satisfactory  
23 overall item and individual fit for each scale will be determined by a fit residual standard deviation  
24 (SD) value of  $\leq 1.5$ . Individual item fit is indicated by two statistics: fit residual values; and Chi-square  
25 probability values. Item fit residual values  $-2.5$  to  $2.5$  indicate adequate fit<sup>58</sup>. Above this range  
26 (underfit) suggests deviation from the model, below (overfit) suggests that some items in the scale  
27 are similar to each other<sup>59</sup>. A perfect model fit would be reflected by residuals with a mean of  $0.00$   
28 and a SD of  $1.00$ . Any mis-fitting item in terms of infit/outfit is discarded and the analysis re-run.  
29 This iterative process is continued until no further misfit is observed<sup>60</sup>. The Rasch analysis will  
30 produce the person separation index (PSI), which indicates the degree to which study participants  
31 can be differentiated into certain groups (PSI range  $0-1$ ). Values for PSI of  $0.8$  are acceptable<sup>61</sup>. A  
32 sample size of at least  $100$  patients is required to perform a Rasch analysis which can estimate an  
33 acceptable PSI value<sup>47</sup>.

34  
35  
36 Statistical significance will be considered at the  $5\%$  level and Bonferroni correction for multiple  
37 testing will be applied where appropriate.

### 39 **Psychometric properties of the final Cardiac Distress Inventory**

40  
41 The COSMIN (Consensus-based Standards for the selection of health Measurement Instruments)  
42 criteria for evaluating the methodological quality of health-related patient-reported outcomes will  
43 be used to inform the development of the methodology for determining the psychometric  
44 properties as far as possible<sup>62, 63</sup>.

#### 46 **Reliability**

47  
48 Internal consistency of the CDI will be determined using Cronbach's alpha, and evaluation of the  
49 Person Separation Index (PSI) from the Rasch analysis.

#### 52 **Validity**

53  
54 Scale comparisons will be used to investigate the concurrent convergent validity of the CDI. Pearson  
55 correlation coefficients will be calculated to explore the association between CDI scores and the  
56 measure that is commonly used in clinical practice to assess distress, the six-item Kessler K6<sup>50</sup>.  
57 Subscale scores of the CDI will be compared with K6 scores where appropriate. We will assess the  
58 discriminant validity and predictive validity of the CDI by assessing whether it distinguishes between  
59 patients scoring high and low on the K6, using the Australian scoring cut-off of  $19$  to indicate  
60

probable serious mental illness<sup>64</sup>. Again, both CDI total and factor scores will be investigated. It is not possible to use a measure of cardiac distress for validity testing as no such measure exists.

Pearson correlation coefficients will also be calculated to explore the association between CDI scores and the Patient Health Questionnaire–4 (PHQ4)<sup>51</sup>. Normative data are available from a nationally representative face-to-face household survey sample of 5030 people, conducted in Germany in 2006<sup>65</sup>. The measure has been translated and validated in Hispanic populations, for example<sup>66</sup>, and has been used in studies of cancer patients<sup>67</sup> and emergency department patients<sup>68</sup>. As far as the authors are aware, no validation study of the PHQ-4 has been undertaken with cardiac patients.

Comparison of CDI scores will also be conducted between the various types of cardiac patients (e.g. AMI vs CABGS). Comparison of groups will be conducted via analysis of variance (ANOVA).

### **Latent Class Analysis**

Latent class analysis (LCA) will be used in order to describe groups of participants that differ in their response patterns to the CDI. LCA explains inter-individual differences in response patterns by means of a given number of latent classes (subgroups of participants). LCA estimates the size of the classes and a membership probability for each participant within each class<sup>69</sup> and will be performed using Mplus version 6.0<sup>70</sup>. To select the most parsimonious number of classes and maximise model fit, a series of latent class models will be applied to the data. First, the simplest 1-class model (all patients are assumed to have the same pattern of cardiac distress) will be applied to the data, followed by successive models with a unitary increase in the number of latent classes (up to eight). Model solutions are evaluated on the basis of their Bayesian information criterion (BIC) and entropy. The BIC has been shown to be a robust indicator of model fit, with lower values indicative of better model fit<sup>71</sup>. BIC will be used in preference to Akaike information criteria, as the latter has been shown to over-extract classes in simulation models<sup>72</sup>. The association of CDI latent class membership with CDI scale scores, sociodemographic characteristics, diagnosis and K6 distress scores will also be examined using Mplus<sup>70</sup>. Mplus generates overall chi-square values to assess significant associations between variables as well as unadjusted chi-square values for exploratory post-hoc analysis.

### **Development of a short form Cardiac Distress Inventory for screening purposes**

A shorter version of the CDI, the CDI-S, will then be created. Importantly, item reduction based on rigorous methodological guidelines is necessary to maintain validity when shortening composite measurement scales<sup>73</sup>. In addition, there are a number of ways to achieve item reduction<sup>74</sup>. In light of these two points, we will use two methods to develop the short form screening tool – a clinically oriented method and a statistically-driven method. A concept-retention approach will create a short version of the original measure by selection of the top performing item in each domain to become part of the short, concept-retention version<sup>75</sup>. Rasch analysis as used in a number of health-related item reduction exercises, will also be employed<sup>76, 77</sup>. The Rasch analysis and psychometric evaluation of the CDI-S will follow the format described by Nishigami and colleagues<sup>77</sup>. Both versions of the CDI-S will then be field tested.

### **Thermometer testing**

Receiver operating characteristic (ROC) analysis will be used to identify the optimal CDI scale cut off score for distinguishing whether a person experiences clinically significant distress as defined by the established cut-off thresholds for ETsum (the sum of all four mood thermometers). The Area Under the Curve (AUC) will be used to estimate the overall discriminative accuracy of the CDI scale cut off score relative to the established cut off scores of ETsum (a score >14 indicates moderate and >20 indicates severe emotional problems). Using qualitative guidelines for interpreting AUC values<sup>78</sup>, namely  $AUC \leq 0.70$  as acceptable discrimination,  $AUC \leq 0.80$  as good discrimination and  $AUC \leq 0.90$  as excellent discrimination. ROC curves will be used to show the trade-off between the sensitivity (true-positive rate) and specificity (true-negative rate) for every possible cut off score of the CDI Scale.



## TIMELINE

Months 1-2: staff recruitment, CR site recruitment and liaison; Months 3-18: Administration of the full item pool draft CDI to patients attending CR or outpatient appointments. Months 19-21: completion of data analysis; Months 22-24: writing up the study findings will be a continuous activity with completion in months 22-24.

## SUMMARY

Cardiac distress is complex and various aspects of cardiac distress have been shown to be common among cardiac patients. Before cardiac distress can be treated effectively, it needs to be properly measured by a reliable, valid and sensitive instrument. Stress is increasingly being recognised as a prognostic factor in those with pre-existing cardiovascular or cerebrovascular disease<sup>79</sup> and stress management in cardiac rehabilitation shows promise<sup>80</sup>. Even so, we are yet to see the totality of cardiac distress, in all of its complexity, being addressed in this way.

The primary aim of the project, therefore, is to develop a new clinical measure which health professionals can use to identify and assess cardiac distress. They can use the fine-grained assessment provided by this unique measure to structure psychological and emotional interventions to intervene in cases of persistent distress in patients, following a cardiac event. No such measure currently exists.

While physical recovery remains the highest priority in preventive cardiology, psychological recovery is now considered a primary concern for health professionals working in cardiac rehabilitation and secondary prevention. The prevalence of clinical anxiety and depression in people who have had a cardiac event is up to four times higher than in the general population, however both the prevalence and nature of the broader concept of cardiac-related distress remains unknown. Post-event psychological problems confer an increased mortality risk for patients, highlighting the importance of identifying distressed patients early in order to ensure appropriate treatment is received. The new CDI will not only enhance clinicians' ability to identify distressed patients but will also enable them to identify the specific nature of the distress, thereby optimising their ability to provide timely support targeted to the specific psychosocial needs of the patient. The new CDI has the potential to ensure that patients are provided with the specific support they require in their psychosocial recovery after a cardiac event and, in doing so, has the potential to improve their quality of life, enhance their behaviour change efforts and ultimately extend their survival.

## References

1. Jackson AC, Murphy BM, Thompson DR, et al. What is cardiac distress and how should we measure it? *British Journal of Cardiac Nursing* 2018; 13: 286-293. DOI: 10.12968/bjca.2018.13.6.286.
2. Stewart RAH, Colquhoun DM, Marschner SL, et al. Persistent psychological distress and mortality in patients with stable coronary artery disease. *Heart* 2017; 103: 1860-1866. 2017/06/28. DOI: 10.1136/heartjnl-2016-311097.
3. Lissaker CT, Wallert J, Held C, et al. Emotional distress as a predictor of statin non-adherence among Swedish first-time myocardial infarction patients, 2006-2013. *J Psychosom Res* 2017; 97: 30-37. 2017/06/14. DOI: 10.1016/j.jpsychores.2017.02.015.
4. Habibović M, Mudde L, Pedersen SS, et al. Sleep disturbance in patients with an implantable cardioverter defibrillator: Prevalence, predictors and impact on health status. *European Journal of Cardiovascular Nursing* 2017; 17: 390-398. DOI: 10.1177/1474515117748931.
5. Sipotz J, Friedrich O, Hofer S, et al. Health related quality of life and mental distress after PCI: restoring a state of equilibrium. *Health Qual Life Outcomes* 2013; 11: 144. 2013/08/29. DOI: 10.1186/1477-7525-11-144.

6. Gostoli S, Roncuzzi R, Urbinati S, et al. Clinical and Subclinical Distress, Quality of Life, and Psychological Well-Being after Cardiac Rehabilitation. *Applied psychology Health and well-being* 2017; 9: 349-369. 2017/11/25. DOI: 10.1111/aphw.12098.
7. Russ TC, Stamatakis E, Hamer M, et al. Association between psychological distress and mortality: individual participant pooled analysis of 10 prospective cohort studies. *BMJ (Clinical research ed)* 2012; 345: e4933. 2012/08/02. DOI: 10.1136/bmj.e4933.
8. Snaith RP and Zigmond AS. *The Hospital Anxiety and Depression Scale - Manual*. Windsor, UK: NFER-Nelson, 1994.
9. Goldberg DP and Hillier VF. A scaled version of the General Health Questionnaire. *Psychol Med* 1979; 9: 139-145. 1979/02/01.
10. Kessler RC, Andrews G, Colpe LJ, et al. Short screening scales to monitor population prevalences and trends in non-specific psychological distress. *Psychol Med* 2002; 32: 959-976. 2002/09/07.
11. Virtanen M, Elovainio M, Josefsson K, et al. Coronary heart disease and risk factors as predictors of trajectories of psychological distress from midlife to old age. *Heart* 2017; 103: 659-665. 2016/11/20. DOI: 10.1136/heartjnl-2016-310207.
12. Kachur S, Menezes AR, De Schutter A, et al. Significance of Comorbid Psychological Stress and Depression on Outcomes After Cardiac Rehabilitation. *Am J Med* 2016; 129: 1316-1321. 2016/08/03. DOI: 10.1016/j.amjmed.2016.07.006.
13. Whitehead DL, Strike P, Perkins-Porras L, et al. Frequency of distress and fear of dying during acute coronary syndromes and consequences for adaptation. *Am J Cardiol* 2005; 96: 1512-1516. 2005/11/29. DOI: 10.1016/j.amjcard.2005.07.070.
14. Claesson M, Burell G, Birgander LS, et al. Psychosocial distress and impaired quality of life - targets neglected in the secondary prevention in women with ischaemic heart disease. *European Journal of Cardiovascular Prevention & Rehabilitation* 2003; 10: 258-266. DOI: 10.1097/01.hjr.0000085255.65733.68.
15. Malinauskaite I, Slapikas R, Courvoisier D, et al. The fear of dying and occurrence of posttraumatic stress symptoms after an acute coronary syndrome: A prospective observational study. *Journal of health psychology* 2017; 22: 208-217. 2015/08/28. DOI: 10.1177/1359105315600233.
16. Denton E-gD, Rieckmann N, Davidson KW, et al. Psychosocial Vulnerabilities to Depression after Acute Coronary Syndrome: The Pivotal Role of Rumination in Predicting and Maintaining Depression. *Frontiers in Psychology* 2012; 3: 288. DOI: 10.3389/fpsyg.2012.00288.
17. Herschbach P, Berg P, Dankert A, et al. Fear of progression in chronic diseases: psychometric properties of the Fear of Progression Questionnaire. *J Psychosom Res* 2005; 58: 505-511. 2005/08/30. DOI: 10.1016/j.jpsychores.2005.02.007.
18. Vilchinsky N, Ginzburg K, Fait K, et al. Cardiac-disease-induced PTSD (CDI-PTSD): A systematic review. *Clinical Psychology Review* 2017; 55: 92-106. DOI: <https://doi.org/10.1016/j.cpr.2017.04.009>.
19. Vaccarino V and Bremner D. Posttraumatic Stress Disorder and Risk of Cardiovascular Disease. In: Alvarenga ME and Byrne D (eds) *Handbook of Psychocardiology*. Singapore: Springer Science + Business Media, 2016, pp.265-282.
20. Cotter G, Milo-Cotter O, Rubinstein D, et al. Posttraumatic stress disorder: A missed link between psychiatric and cardiovascular morbidity? *CNS Spectrums* 2006; 11: 129-136.
21. Shemesh E, Koren-Michowitz M, Yehuda R, et al. Symptoms of posttraumatic stress disorder in patients who have had a myocardial infarction. *Psychosomatics* 2006; 47: 231-239.
22. Murphy BM, Higgins RO, Jackson AC, et al. Patients want to know about the 'cardiac blues'. *Australian family physician* 2015; 44: 826-832.
23. Higgins RO, Murphy BM, Nicholas A, et al. Emotional and adjustment issues faced by cardiac patients seen in clinical practice: a qualitative survey of experienced clinicians. *J Cardiopulm Rehabil Prev* 2007; 27: 291-297. 2007/09/22. DOI: 10.1097/01.HCR.0000291296.62894.e5.

- 1  
2  
3 24. Murphy BM, Higgins RO and Jackson AC. Anxiety, depression and psychological adjustment  
4 after an acute cardiac event. In: Alvarenga ME and Byrne D (eds) *Handbook of Psychocardiology*.  
5 Singapore: Springer, 2016.
- 6 25. Murphy BM, Elliott PC, Higgins RO, et al. Anxiety and depression after coronary artery  
7 bypass graft surgery: most get better, some get worse. *Eur J Cardiovasc Prev Rehabil* 2008; 15: 434-  
8 440. 2008/08/05. DOI: 10.1097/HJR.0b013e3282fbc945.
- 9 26. Tully PJ and Baker RA. Depression, anxiety, and cardiac morbidity outcomes after coronary  
10 artery bypass surgery: a contemporary and practical review. *Journal of Geriatric Cardiology* 2012; 9:  
11 197-208.
- 12 27. NCCN. NCCN Clinical Guidelines in Oncology. *Distress Management Version 2.2017*. National  
13 Comprehensive Cancer Network, 2017.
- 14 28. Ridner SH. Psychological distress: concept analysis. *J Adv Nurs* 2004; 45: 536-545.  
15 2004/03/11.
- 16 29. Dennick K, Sturt J and Speight J. What is diabetes distress and how can we measure it? A  
17 narrative review and conceptual model. *Journal of diabetes and its complications* 2017; 31: 898-911.  
18 2017/03/10. DOI: 10.1016/j.jdiacomp.2016.12.018.
- 19 30. Snoek FJ, Bremmer MA and Hermanns N. Constructs of depression and distress in diabetes:  
20 time for an appraisal. *The lancet Diabetes & endocrinology* 2015; 3: 450-460. 2015/05/23. DOI:  
21 10.1016/s2213-8587(15)00135-7.
- 22 31. Barry V, Stout ME, Lynch ME, et al. The effect of psychological distress on health outcomes:  
23 A systematic review and meta-analysis of prospective studies. *Journal of health psychology* 2019:  
24 1359105319842931. DOI: 10.1177/1359105319842931.
- 25 32. Hare DL and Davis CR. Cardiac Depression Scale: validation of a new depression scale for  
26 cardiac patients. *J Psychosom Res* 1996; 40: 379-386. 1996/04/01. DOI: 0022399995006125 [pii].
- 27 33. Bennett SJ, Puntenney PJ, Walker NL, et al. Development of an instrument to measure threat  
28 related to cardiac events. *Nursing research* 1996; 45: 266-270. 1996/09/01.
- 29 34. Eifert GH, Thompson RN, Zvolensky MJ, et al. The cardiac anxiety questionnaire:  
30 development and preliminary validity. *Behav Res Ther* 2000; 38: 1039-1053. 2000/09/27.
- 31 35. Valenti L, Lim L, Heller RF, et al. An improved questionnaire for assessing quality of life after  
32 acute myocardial infarction. *Quality of life research : an international journal of quality of life aspects*  
33 *of treatment, care and rehabilitation* 1996; 5: 151-161. 1996/02/01.
- 34 36. Young QR, Ignaszewski A, Fofonoff D, et al. Brief screen to identify 5 of the most common  
35 forms of psychosocial distress in cardiac patients: validation of the screening tool for psychological  
36 distress. *J Cardiovasc Nurs* 2007; 22: 525-534. 2007/12/20. DOI:  
37 10.1097/01.jcn.0000297383.29250.14.
- 38 37. Thompson DR, Jenkinson C, Roebuck A, et al. Development and validation of a short  
39 measure of health status for individuals with acute myocardial infarction: the myocardial infarction  
40 dimensional assessment scale (MIDAS). *Quality of life research : an international journal of quality of*  
41 *life aspects of treatment, care and rehabilitation* 2002; 11: 535-543. 2002/09/11.
- 42 38. van Montfort E, Denollet J, Widdershoven J, et al. Validity of the European Society of  
43 Cardiology's Psychosocial Screening Interview in Patients With Coronary Artery Disease-The  
44 THORESCI Study. *Psychosom Med* 2017; 79: 404-415. 2016/12/07. DOI:  
45 10.1097/psy.0000000000000433.
- 46 39. Piepoli MF, Hoes AW, Agewall S, et al. European Guidelines on cardiovascular disease  
47 prevention in clinical practice: The Sixth Joint Task Force of the European Society of Cardiology and  
48 Other Societies on Cardiovascular Disease Prevention in Clinical Practice (constituted by  
49 representatives of 10 societies and by invited experts) Developed with the special contribution of the  
50 European Association for Cardiovascular Prevention & Rehabilitation (EACPR). . *Eur Heart J* 2016; 37:  
51 2315-2381.
- 52  
53  
54  
55  
56  
57  
58  
59  
60

- 1  
2  
3 40. Pedersen SS and Andersen CM. Minding the heart: Why are we still not closer to treating  
4 depression and anxiety in clinical cardiology practice? *European Journal of Preventive Cardiology*  
5 2017; 2047487317744367. DOI: 10.1177/2047487317744367.  
6  
7 41. Richards SH, Anderson L, Jenkinson CE, et al. Psychological interventions for coronary heart  
8 disease. *Cochrane Database Syst Rev* 2017; 4: Cd002902. 2017/04/30. DOI:  
9 10.1002/14651858.CD002902.pub4.  
10 42. Boateng GO, Neilands TB, Frongillo EA, et al. Best Practices for Developing and Validating  
11 Scales for Health, Social, and Behavioral Research: A Primer. *Frontiers in public health* 2018; 6: 149-  
12 149. DOI: 10.3389/fpubh.2018.00149.  
13 43. Riley WT, Pilkonis P and Cella D. Application of the National Institutes of Health Patient-  
14 reported Outcome Measurement Information System (PROMIS) to mental health research. *The*  
15 *journal of mental health policy and economics* 2011; 14: 201-208. 2012/02/22.  
16 44. Beaton DE, Bombardier C, Guillemin F, et al. Guidelines for the process of cross-cultural  
17 adaptation of self-report measures. *Spine (Phila Pa 1976)* 2000; 25: 3186-3191. 2000/12/22. DOI:  
18 10.1097/00007632-200012150-00014.  
19 45. Kinzie JD and Manson SM. The use of self-rating scales in cross-cultural psychiatry. *Hospital*  
20 *& Community Psychiatry* 1987; 38: 190-195.  
21 46. Polit DF and Beck CT. *Essentials of Nursing Research: Appraising Evidence For Nursing*  
22 *Practice, 9th Edition*. Philadelphia, USA: Wolters Kluwer, 2018.  
23 47. Chen WH, Lenderking W, Jin Y, et al. Is Rasch model analysis applicable in small sample size  
24 pilot studies for assessing item characteristics? An example using PROMIS pain behavior item bank  
25 data. *Quality of life research : an international journal of quality of life aspects of treatment, care and*  
26 *rehabilitation* 2014; 23: 485-493. 2013/08/06. DOI: 10.1007/s11136-013-0487-5.  
27 48. Faul F, Erdfelder E, Buchner A, et al. Statistical power analyses using G\*Power 3.1: tests for  
28 correlation and regression analyses. *Behavior research methods* 2009; 41: 1149-1160. 2009/11/10.  
29 DOI: 10.3758/brm.41.4.1149.  
30 49. Mitchell AJ, Morgan JP, Petersen D, et al. Validation of simple visual-analogue thermometer  
31 screen for mood complications of cardiovascular disease: the Emotion Thermometers. *J Affect Disord*  
32 2012; 136: 1257-1263. 2011/07/05. DOI: 10.1016/j.jad.2011.06.008.  
33 50. Furukawa TA, Kessler RC, Slade T, et al. The performance of the K6 and K10 screening scales  
34 for psychological distress in the Australian National Survey of Mental Health and Well-Being. *Psychol*  
35 *Med* 2003; 33: 357-362. 2003/03/08.  
36 51. Kroenke K, Spitzer RL, Williams JBW, et al. An Ultra-Brief Screening Scale for Anxiety and  
37 Depression: The PHQ-4. *Psychosomatics* 2009; 50: 613-621. DOI: [https://doi.org/10.1016/S0033-3182\(09\)70864-3](https://doi.org/10.1016/S0033-3182(09)70864-3).  
38 52. Tennant A and Pallant J. Unidimensionality Matters *Rasch Measurement Transactions* 2006;  
39 20: 1048-1051.  
40 53. Horn JL. A rationale and test for the number of factors in factor analysis. *Psychometrika*  
41 1965; 30: 179-185. DOI: 10.1007/BF02289447.  
42 54. Zwick WR and Velicer WF. Comparison of five rules for determining the number of  
43 components to retain. *Psychological bulletin* 1986; 99: 432-442.  
44 55. Masters GN. A rasch model for partial credit scoring. *Psychometrika* 1982; 47: 149-174. DOI:  
45 10.1007/BF02296272.  
46 56. Bell RC. Person fit and person reliability. *Educational Research & Perspectives* 1982; 9: 105-  
47 113.  
48 57. Shea TL, Tennant A and Pallant JF. Rasch model analysis of the Depression, Anxiety and  
49 Stress Scales (DASS). *BMC psychiatry* 2009; 9: 21. 2009/05/12. DOI: 10.1186/1471-244x-9-21.  
50 58. Ramp M, Khan F, Misajon RA, et al. Rasch analysis of the Multiple Sclerosis Impact Scale  
51 MSIS-29. *Health Qual Life Outcomes* 2009; 7: 58. 2009/06/24. DOI: 10.1186/1477-7525-7-58.  
52 59. Sharrack B, Hughes RA, Soudain S, et al. The psychometric properties of clinical rating scales  
53 used in multiple sclerosis. *Brain* 1999; 122 ( Pt 1): 141-159. 1999/03/02.  
54  
55  
56  
57  
58  
59  
60



- 1
  - 2
  - 3
  - 4
  - 5
  - 6
  - 7
  - 8
  - 9
  - 10
  - 11
  - 12
  - 13
  - 14
  - 15
  - 16
  - 17
  - 18
  - 19
  - 20
  - 21
  - 22
  - 23
  - 24
  - 25
  - 26
  - 27
  - 28
  - 29
  - 30
  - 31
  - 32
  - 33
  - 34
  - 35
  - 36
  - 37
  - 38
  - 39
  - 40
  - 41
  - 42
  - 43
  - 44
  - 45
  - 46
  - 47
  - 48
  - 49
  - 50
  - 51
  - 52
  - 53
  - 54
  - 55
  - 56
  - 57
  - 58
  - 59
  - 60
60. Wu M and Adams R. Applying the Rasch model to psycho-social measurement: A practical approach. In: Educational Measurement Solutions, (ed.). Melbourne 2007.
61. Prieto L, Alonso J and Lamarca R. Classical Test Theory versus Rasch analysis for quality of life questionnaire reduction. *Health Qual Life Outcomes* 2003; 1: 27. 2003/09/04. DOI: 10.1186/1477-7525-1-27.
62. Mokkink LB, Terwee CB, Knol DL, et al. The COSMIN checklist for evaluating the methodological quality of studies on measurement properties: a clarification of its content. *BMC Med Res Methodol* 2010; 10: 22. 2010/03/20. DOI: 10.1186/1471-2288-10-22.
63. Terwee CB, Bot SD, de Boer MR, et al. Quality criteria were proposed for measurement properties of health status questionnaires. *J Clin Epidemiol* 2007; 60: 34-42. 2006/12/13. DOI: 10.1016/j.jclinepi.2006.03.012.
64. Kessler RC, Green JG, Gruber MJ, et al. Screening for Serious Mental Illness in the General Population with the K6 screening scale: results from the WHO World Mental Health (WMH) survey initiative *International Journal of Methods in Psychiatric Research* 2010; 19: 4-22.
65. Löwe B, Wahl I, Rose M, et al. A 4-item measure of depression and anxiety: Validation and standardization of the Patient Health Questionnaire-4 (PHQ-4) in the general population. *Journal of Affective Disorders* 2010; 122: 86-95. DOI: <https://doi.org/10.1016/j.jad.2009.06.019>.
66. Kocalevent R-D, Finck C, Jimenez-Leal W, et al. Standardization of the Colombian version of the PHQ-4 in the general population. *BMC psychiatry* 2014; 14: 205-205. DOI: 10.1186/1471-244X-14-205.
67. Nipp RD, El-Jawahri A, Moran SM, et al. The relationship between physical and psychological symptoms and health care utilization in hospitalized patients with advanced cancer. *Cancer* 2017; 123: 4720-4727. 2017/10/23. DOI: 10.1002/cncr.30912.
68. Faessler L, Kutz A, Haubitz S, et al. Psychological distress in medical patients 30 days following an emergency department admission: results from a prospective, observational study. *BMC emergency medicine* 2016; 16: 33-33. DOI: 10.1186/s12873-016-0097-y.
69. Lanza ST and Rhoades BL. Latent class analysis: an alternative perspective on subgroup analysis in prevention and treatment. *Prevention science : the official journal of the Society for Prevention Research* 2013; 14: 157-168. 2011/02/15. DOI: 10.1007/s11121-011-0201-1.
70. MPLUS (Version 6.11). Los Angeles, Calif.: Muthen & Muthen.
71. D'Unger AV, Land KC, McCall PL, et al. How many latent classes of delinquent/criminal careers? Results from mixed Poisson regression analyses. *American Journal of Sociology* 1998; 103: 1593-1630.
72. Nylund KL, Asparouhov T and Muthén BO. Deciding on the Number of Classes in Latent Class Analysis and Growth Mixture Modeling: A Monte Carlo Simulation Study. *Structural Equation Modeling: A Multidisciplinary Journal* 2007; 14: 535-569. DOI: 10.1080/10705510701575396.
73. Goetz C, Coste J, Lemetayer F, et al. Item reduction based on rigorous methodological guidelines is necessary to maintain validity when shortening composite measurement scales. *J Clin Epidemiol* 2013; 66: 710-718. 2013/04/10. DOI: 10.1016/j.jclinepi.2012.12.015.
74. Coste J, Guillemin F, Pouchot J, et al. Methodological approaches to shortening composite measurement scales. *J Clin Epidemiol* 1997; 50: 247-252. 1997/03/01. DOI: 10.1016/s0895-4356(96)00363-0.
75. Beaton DE, Wright JG, Katz JN, et al. Development of the QuickDASH: Comparison of three item-reduction approaches. *Journal of Bone and Joint Surgery* 2005; 87-A: 1038-1046.
76. Las Hayas C, Quintana JM, Padierna JA, et al. Use of Rasch methodology to develop a short version of the health related quality of life for eating disorders questionnaire: a prospective study. *Health and quality of life outcomes* 2010; 8: 29-29. DOI: 10.1186/1477-7525-8-29.
77. Nishigami T, Tanaka K, Mibu A, et al. Development and psychometric properties of short form of central sensitization inventory in participants with musculoskeletal pain: A cross-sectional study. *PLOS ONE* 2018; 13: e0200152. DOI: 10.1371/journal.pone.0200152.

- 1  
2  
3 78. Hosmer D and Lemeshow S. Applied Logistic Regression. Wiley-Interscience : New York.  
4 2000.  
5 79. Kivimaki M and Steptoe A. Effects of stress on the development and progression of  
6 cardiovascular disease. *Nat Rev Cardiol* 2017. DOI: 10.1038/nrcardio.2017.189.  
7  
8 80. Blumenthal JA, Sherwood A, Smith PJ, et al. Enhancing Cardiac Rehabilitation With Stress  
9 Management Training: A Randomized, Clinical Efficacy Trial. *Circulation* 2016; 133: 1341-1350.  
10 2016/04/06. DOI: 10.1161/circulationaha.115.018926.  
11  
12  
13  
14  
15  
16  
17  
18  
19  
20  
21  
22  
23  
24  
25  
26  
27  
28  
29  
30  
31  
32  
33  
34  
35  
36  
37  
38  
39  
40  
41  
42  
43  
44  
45  
46  
47  
48  
49  
50  
51  
52  
53  
54  
55  
56  
57  
58  
59  
60

For peer review only

1  
2  
3 **Authors contributions:** AJ drafted the article with MLG drafting the psychometric testing  
4 component. MR, MLG, DR, CS, MA, JA, RO, MR, BM made contributions to the resulting draft. All  
5 authors approved the final version.  
6

7 **Funding:** This project received no specific grant from any funding agency in the public, commercial  
8 or not-for-profit sectors.  
9

10 **Competing interests:** All authors declare that they have no competing interests.  
11

12 **Acknowledgements:** The authors would like to thank the patients and patient support groups who  
13 assisted in the development of the CDI version for testing. They would also like to acknowledge the  
14 generous posthumous gift by Ms Angela Anita Reid to the Australian Centre for Heart Health which  
15 is funding this project.  
16  
17  
18  
19  
20  
21  
22  
23  
24  
25  
26  
27  
28  
29  
30  
31  
32  
33  
34  
35  
36  
37  
38  
39  
40  
41  
42  
43  
44  
45  
46  
47  
48  
49  
50  
51  
52  
53  
54  
55  
56  
57  
58  
59  
60

Table 1: Numbers required for each stage of the development and testing of the Cardiac Distress Inventory

| Steps                       | Purpose                                                    | N required with rationale                                                                                                                                                                                                                                                                                                                                     |
|-----------------------------|------------------------------------------------------------|---------------------------------------------------------------------------------------------------------------------------------------------------------------------------------------------------------------------------------------------------------------------------------------------------------------------------------------------------------------|
| <i>Development</i>          |                                                            |                                                                                                                                                                                                                                                                                                                                                               |
| Exploratory Factor Analysis | Establish number of dimensions                             | (74 items X 5=370) cardiac patients (AMI, AF, CABGS, unstable angina plus heart failure patients with New York Heart Association (NYHA) classification of mild (NYHA 11) or moderate (NYHA 111) heart failure. Allowing for 10 percent missing data, a sample size of (74 items X 5=370 + 10% = 407) would therefore be required for this phase of the study. |
| Rasch Analysis              | Eliminate items per dimension                              | The Rasch Analysis will utilise the total baseline sample and will not require a sub-sample.                                                                                                                                                                                                                                                                  |
| <i>Testing</i>              |                                                            |                                                                                                                                                                                                                                                                                                                                                               |
| Construct validity          |                                                            | 66 cardiac patients administered both the CDI and K6. (Using the reduced item version of the CDI).                                                                                                                                                                                                                                                            |
| Latent Class Analysis       | Identify inter-individual differences in response patterns | The LCA analysis will utilise the total baseline sample and will not require a sub-sample.                                                                                                                                                                                                                                                                    |



# BMJ Open

## Protocol for the development and validation of a measure of persistent psychological and emotional distress in cardiac patients: The Cardiac Distress Inventory

|                                 |                                                                                                                                                                                                                                                                                                                                                                                                                                                                                                                                                                                                                                                                                                                                                                                                                                                                                                                                                                                                                                                     |
|---------------------------------|-----------------------------------------------------------------------------------------------------------------------------------------------------------------------------------------------------------------------------------------------------------------------------------------------------------------------------------------------------------------------------------------------------------------------------------------------------------------------------------------------------------------------------------------------------------------------------------------------------------------------------------------------------------------------------------------------------------------------------------------------------------------------------------------------------------------------------------------------------------------------------------------------------------------------------------------------------------------------------------------------------------------------------------------------------|
| Journal:                        | <i>BMJ Open</i>                                                                                                                                                                                                                                                                                                                                                                                                                                                                                                                                                                                                                                                                                                                                                                                                                                                                                                                                                                                                                                     |
| Manuscript ID                   | bmjopen-2019-034946.R2                                                                                                                                                                                                                                                                                                                                                                                                                                                                                                                                                                                                                                                                                                                                                                                                                                                                                                                                                                                                                              |
| Article Type:                   | Protocol                                                                                                                                                                                                                                                                                                                                                                                                                                                                                                                                                                                                                                                                                                                                                                                                                                                                                                                                                                                                                                            |
| Date Submitted by the Author:   | 21-Apr-2020                                                                                                                                                                                                                                                                                                                                                                                                                                                                                                                                                                                                                                                                                                                                                                                                                                                                                                                                                                                                                                         |
| Complete List of Authors:       | Jackson, Alun; Australian Centre for Heart Health,; Deakin University Faculty of Health<br>Rogerson, Michelle; Australian Centre for Heart Health<br>Le Grande , Michael; Australian Centre for Heart Health; University of Melbourne, Centre for Behaviour Change, Melbourne School of Psychological Sciences<br>Thompson, David; Queen's University Belfast, School of Nursing and Midwifery; Australian Centre for Heart Health<br>Ski, Chantal; Queen's University, Belfast, School of Nursing and Midwifery; Australian Centre for Heart Health<br>Alvarenga, Marlies; Federation University Australia - Berwick Campus, School of Health and Life Sciences; MonashHeart, Monash Cardiovascular Research Centre<br>Amerena, John; Barwon Health, Cardiac Services; Deakin School of Medicine<br>Higgins, Rosemary; Australian Centre for Heart Health; Deakin University, Faculty of Health<br>Raciti, Michela; Australian Centre for Heart Health<br>Murphy, Barbara; Australian Centre for Heart Health; Deakin University Faculty of Health |
| <b>Primary Subject Heading</b>: | Cardiovascular medicine                                                                                                                                                                                                                                                                                                                                                                                                                                                                                                                                                                                                                                                                                                                                                                                                                                                                                                                                                                                                                             |
| Secondary Subject Heading:      | Mental health                                                                                                                                                                                                                                                                                                                                                                                                                                                                                                                                                                                                                                                                                                                                                                                                                                                                                                                                                                                                                                       |
| Keywords:                       | Adult cardiology < CARDIOLOGY, Protocols & guidelines < HEALTH SERVICES ADMINISTRATION & MANAGEMENT, Cardiology < INTERNAL MEDICINE, MENTAL HEALTH                                                                                                                                                                                                                                                                                                                                                                                                                                                                                                                                                                                                                                                                                                                                                                                                                                                                                                  |
|                                 |                                                                                                                                                                                                                                                                                                                                                                                                                                                                                                                                                                                                                                                                                                                                                                                                                                                                                                                                                                                                                                                     |

SCHOLARONE™  
Manuscripts



I, the Submitting Author has the right to grant and does grant on behalf of all authors of the Work (as defined in the below author licence), an exclusive licence and/or a non-exclusive licence for contributions from authors who are: i) UK Crown employees; ii) where BMJ has agreed a CC-BY licence shall apply, and/or iii) in accordance with the terms applicable for US Federal Government officers or employees acting as part of their official duties; on a worldwide, perpetual, irrevocable, royalty-free basis to BMJ Publishing Group Ltd ("BMJ") its licensees and where the relevant Journal is co-owned by BMJ to the co-owners of the Journal, to publish the Work in this journal and any other BMJ products and to exploit all rights, as set out in our [licence](#).

The Submitting Author accepts and understands that any supply made under these terms is made by BMJ to the Submitting Author unless you are acting as an employee on behalf of your employer or a postgraduate student of an affiliated institution which is paying any applicable article publishing charge ("APC") for Open Access articles. Where the Submitting Author wishes to make the Work available on an Open Access basis (and intends to pay the relevant APC), the terms of reuse of such Open Access shall be governed by a Creative Commons licence – details of these licences and which [Creative Commons](#) licence will apply to this Work are set out in our licence referred to above.

Other than as permitted in any relevant BMJ Author's Self Archiving Policies, I confirm this Work has not been accepted for publication elsewhere, is not being considered for publication elsewhere and does not duplicate material already published. I confirm all authors consent to publication of this Work and authorise the granting of this licence.

1  
2  
3 **Protocol for the development and validation of a measure of persistent psychological and**  
4 **emotional distress in cardiac patients: The Cardiac Distress Inventory**  
5  
6  
7

8 **Alun C Jackson** PhD (Corresponding author), Director, Australian Centre for Heart Health,  
9 Melbourne, Victoria, Australia; Honorary Professor, Faculty of Health, Deakin University, Geelong,  
10 Australia; Honorary Professor, Centre on Behavioural Health, University of Hong Kong, Pokfulam,  
11 Hong Kong. Address: PO Box 2137, The Royal Melbourne Hospital, Victoria 3050 Australia; Ph: +61 3  
12 9326 8544; Email: [alun.jackson@australianhearthealth.org.au](mailto:alun.jackson@australianhearthealth.org.au)  
13  
14

15 **Michelle Rogerson** PhD, Research Fellow, Australian Centre for Heart Health, Melbourne, Australia.

16 **Michael R Le Grande** MPH, Senior Research Fellow, Australian Centre for Heart Health, Melbourne,  
17 Australia; Research Fellow, Centre for Behaviour Change, Melbourne School of Psychological  
18 Sciences, University of Melbourne, Melbourne, Australia.  
19

20 **David R Thompson** PhD, Professor, School of Nursing and Midwifery, Queen's University Belfast, UK;  
21 Honorary Professorial Fellow, Australian Centre for Heart Health, Melbourne, Australia; Honorary  
22 Professor, Department of Psychiatry, University of Melbourne, Melbourne, Australia.  
23  
24

25 **Chantal F Ski** PhD, Reader, School of Nursing and Midwifery, Queen's University Belfast, UK;  
26 Honorary Principal Research Fellow, Australian Centre for Heart Health, Melbourne, Australia;  
27 Honorary Associate Professor, Department of Psychiatry, University of Melbourne, Melbourne,  
28 Australia.  
29

30 **Marlies E Alvarenga** PhD, Lecturer in Psychology, School of Health and Life Sciences, Federation  
31 University Australia, Berwick, Australia; Consultant Clinical Psychologist, Monash Cardiovascular  
32 Research Centre, MonashHEART, Melbourne, Australia & Monash Health & Department of Medicine,  
33 Monash University, Melbourne, Australia & Australian Centre for Heart Health, Melbourne, Australia  
34  
35

36 **John Amerena** MB BS, Director of Cardiac Services, Barwon Health, Geelong, Australia; Clinical  
37 Associate Professor, Deakin School of Medicine, University Hospital Geelong, Geelong, Australia.  
38

39 **Rosemary O Higgins** DPsych, Clinical Consultant (Health Psychology), Australian Centre for Heart  
40 Health, Melbourne, Australia; Honorary Associate Professor, Department of Psychology, Deakin  
41 University, Geelong, Australia; Honorary Associate Professor, Department of Physiotherapy,  
42 University of Melbourne, Melbourne, Australia.  
43  
44

45 **Michela Raciti** BPsych, Research Intern, Australian Centre for Heart Health, Melbourne, Australia

46 **Barbara M Murphy** PhD, Principal Researcher, Australian Centre for Heart Health, Melbourne,  
47 Australia; Honorary Associate Professor, Faculty of Health, Deakin University, Geelong, Australia;  
48 Honorary Senior Research Fellow, Department of Psychology, University of Melbourne, Melbourne,  
49 Australia.  
50

51 **Key words:** cardiac distress, anxiety, depression, psychometrics, instrument development  
52

53 **Word count:** 4371  
54  
55  
56  
57  
58  
59  
60

## ABSTRACT

**Introduction** Distress is experienced by the majority of cardiac patients, yet no cardiac-specific measure of distress exists. The aim of this project is to develop and validate the *Cardiac Distress Inventory* (CDI). Using the CDI, health professionals will be able to identify key clusters of psychological, emotional and social concern to address with patients, post-cardiac event.

**Methods and analysis** An item pool will be generated through: identification of items by a multidisciplinary group of clinician researchers; review of generic and condition-specific distress measures; focus group testing with cardiac rehab professionals; feedback from patients. The COSMIN criteria will be used to inform the development of the methodology for determining the CDI's psychometric properties. The item pool will be tested with 400 cardiac patients and responses subjected to exploratory factor analysis, Rasch analysis, construct validity testing, and latent class analysis. ROC analysis will be used to identify the optimal CDI cut off score for distinguishing whether a person experiences clinically significant distress.

**Ethics and dissemination** Approved by the Monash Health Human Research Ethics Committee (Approval number – RES-19-0000631L-55979 0). The CDI will be made available to clinicians and researchers without charge. The CDI will be translated for use internationally. Study findings will be shared with cardiac patient support groups; academic and medical communities via publications and presentations; in the training of cardiac secondary prevention professionals; and in reports to funders. Authorship for publications will follow the Uniform Requirements for Manuscripts Submitted to Biomedical Journals.

### Strengths and limitations

- This will be the first available cardiac-specific distress measure based on a multidisciplinary conceptualisation of the core construct
- It builds on scale development in oncology and diabetes
- It will be developed using co-design principles.
- It will compare a clinically-driven and a statistically-driven method of developing a short-form of the measure for use as a screening tool

## BACKGROUND

### Conceptualisation of cardiac distress

As high prevalence conditions, much attention has been paid to the measurement and understanding of anxiety and depression as consequences of cardiac events. However, less attention has been given to the phenomenon of 'cardiac distress' which many patients experience after acute coronary events such as myocardial infarction (AMI), unstable angina, or coronary artery bypass graft surgery (CABGS). In an earlier paper, we discussed the conceptualisation of cardiac distress and defined it as:

"a persistent negative emotional state rather than a transient state; involving multiple psychosocial domains; that challenges a patient's capacity to cope with living with their heart condition, the treatment of the condition, and the resultant changes to daily living; and challenges the person's sense of self and future orientation"<sup>1</sup>.

A number of previous studies have attempted to examine the relationship between post-cardiac event distress, symptom severity and mortality in relation to a range of specific heart conditions<sup>2,3</sup> and procedures<sup>4,5</sup>, following cardiac rehabilitation<sup>6</sup>, and in cardiovascular disease more generally<sup>7</sup>. A common characteristic of these studies, however, is the use of terms such as 'distress' without explicit definition. In some cases, distress is simply defined as being that which is measured by an instrument deemed to measure distress such as the Hospital Anxiety and Depression Scale<sup>8</sup>, the General Health Questionnaire<sup>9</sup> or the Kessler Psychological Distress Scale<sup>10</sup>. Typically, these studies view psychological or emotional distress as a simple combination of anxiety and depression, as does a recent analysis of post-cardiac event psychological distress trajectories<sup>11</sup>.

A small number of studies of cardiac patients, however, widen this narrow view of distress by adding other psychosocial constructs to 'anxiety plus depression', including stress and stressful life events<sup>12-14</sup>; fear of death<sup>13,15</sup>; hostility<sup>12</sup>; vital exhaustion and reduced quality of life<sup>14</sup>; vulnerabilities such as lack of pleasant events, dysfunctional attitudes, role transitions and poor dyadic adjustment<sup>16</sup>; feelings of helplessness, loss of control, and pain<sup>15</sup>; and psychological wellbeing<sup>6</sup>. In other chronic conditions such as cancer, diabetes and rheumatic conditions, fear of disease progression has also been identified as an important reason for distress<sup>17</sup>. This future-oriented component of distress is expressed in an extreme form in cardiac-induced post-traumatic stress disorder (CDI-PTSD) with Vilchinsky and colleagues noting that fear of death dominates the experience of patients with CDI-PTSD<sup>18</sup>.

Traumatic components of a cardiac event are the abruptness of the event, the risk of death, and a strong sense of loss of control and helplessness during the event<sup>18</sup>. These reactions, coupled with the experience of surgery can lead to significant anxiety associated with death or recurrence, as well as anger, sadness and grief<sup>19</sup>, all symptoms associated with PTSD<sup>20,21</sup>. Differentiating distress from cardiac disease induced-PTSD (CDI-PTSD), however, are a range of additional psychosocial factors such as challenges to people's coping with daily living, the impact of social isolation, role transitions and challenges, and cognitive issues.

### The 'cardiac blues'

A broader approach to understanding the complexity of the psychological and emotional impacts of a cardiac event is evidenced in the concept of the 'cardiac blues' which describes a range of emotional responses to an acute cardiac event. It has been suggested that almost all patients experience at least some symptoms of the cardiac blues at the time of, or soon after, an acute cardiac event<sup>22</sup>. Common emotions include shock, low or fluctuating mood, sadness, worry, guilt and anger. Mood changes are displayed by tiredness, irritability, tearfulness, loss of pleasure in usual activities, withdrawal from others, early waking and other sleep disturbance, and changes in appetite and sex drive. Cognitive changes that typically co-occur include confusion and forgetfulness, inability to concentrate, nightmares, reduced self-esteem, concerns about role changes, particularly

1  
2  
3 regarding paid work, physical health and independence; and pessimism about the future<sup>22-24</sup>.  
4 Although generally a transient condition<sup>25, 26</sup>, if the cardiac blues does not resolve within around two  
5 months of the cardiac event, the psychological and emotional impact of the event can result in  
6 persistent cardiac distress<sup>23, 24</sup>.  
7

### 8 **Measuring condition-specific distress**

9  
10 Both the oncology and diabetes fields have at least a two decade-long history of screening and  
11 psychosocial intervention for condition-specific distress. For oncology, this is reflected in the  
12 National Comprehensive Cancer Network Guidelines for Distress Management<sup>27</sup> where distress is  
13 considered to be a multifactorial unpleasant experience of a psychological (i.e., emotional,  
14 behavioural, cognitive), social, spiritual, and/or physical nature that may interfere with the ability to  
15 cope effectively with cancer, its physical symptoms or its treatment. An excellent earlier attempt to  
16 conceptualise diabetes distress so that it could be recognised and addressed in nursing practice<sup>28</sup>,  
17 has recently been extended by Dennick and colleagues<sup>29</sup>. They characterise distress as a range of  
18 negative emotional responses, such as worry, fear, frustration, guilt, sadness, anger, to aspects of  
19 living with and managing the condition, balanced against an appraisal of available coping  
20 resources<sup>29</sup>. Snoek and colleagues argue that diabetes-distress and depression are correlated and  
21 overlapping constructs, but are not interchangeable, and that distinguishing between them is an  
22 important factor in shaping appropriate mental health interventions<sup>30</sup>. In a recent systematic review  
23 of the impact of distress on health-related outcomes, Barry and colleagues agree also that distress is  
24 distinct from depression and should be assessed using condition-specific measures, as early as  
25 practicable in treatment<sup>31</sup>.  
26  
27

### 28 **Cardiac-specific measures of the psychosocial impact of cardiac events**

29  
30 The cardiac field also has a two decade-long history of attempts to measure specific aspects of the  
31 psychological and emotional impact of cardiac events. Examples of cardiac-specific measures  
32 include the Cardiac Depression Scale<sup>32</sup>, the Cardiac Event Threat Questionnaire<sup>33</sup>, the Cardiac  
33 Anxiety Questionnaire<sup>34</sup>, the MacNew Quality of Life measure<sup>35</sup>, the Screening Tool for Psychological  
34 Distress (STOP-D)<sup>36</sup>, the Myocardial Infarction Dimensional Assessment Scale (MIDAS)<sup>37</sup>, and the  
35 European Society of Cardiology (ESC) brief (15-item) screen of psychosocial risk factors for cardiac  
36 patients<sup>38</sup>. These measures collectively assess a range of features associated with cardiac distress  
37 such as impaired quality of life, anxiety, depression, fear, death anxiety, illness-related dependency,  
38 feeling unable to cope, work and family stress, worrying levels of pain, social isolation and low  
39 perceived social support, anger and Type D personality. However, there remains no single  
40 comprehensive assessment of cardiac distress as we have defined it<sup>1</sup>. While the Joint ESC Guidelines  
41 psychosocial screen is an excellent start in this regard<sup>39</sup>, and provide an indicator for a health  
42 professional that psychosocial support is warranted, a measure is needed that enables a cardiac  
43 psychology professional to clearly identify priority areas in order to offer a timely tailored  
44 intervention for a distressed patient<sup>40, 41</sup>. Using the *Cardiac Distress Inventory* (CDI), health  
45 professionals will be able to identify key clusters of psychological, emotional and social concern to  
46 address with patients, post-cardiac event at a depth not afforded by one or two questions per  
47 construct as in the ESC core questions for the assessment of psychosocial risk factors in clinical  
48 practice<sup>39</sup>. For good clinical intervention, we need to know not just that people are anxious, but they  
49 are anxious about. Similarly, what is it that they fear: death, loss of function, loss of role, loss of  
50 intimacy? Achieving this degree of granularity to guide intervention is the point of the Cardiac  
51 Distress inventory.  
52  
53  
54

### 55 **Aims**

56 The aims of the present study are:

- 57 1. To develop and validate the Cardiac Distress Inventory (CDI).
- 58 2. To develop a short form screening tool version of the CDI.
- 59
- 60



## METHOD

The method described in this protocol for development and validation of the CDI conforms, we believe, to the 'best practices' for undertaking such a task, outlined by Boateng and colleagues<sup>42</sup>.

### Item generation

There are six steps in the item generation procedure:

- i. Initial generation of items by a multidisciplinary group of researchers and clinicians including the disciplines of nursing, psychiatry, behavioural health, psychology and cardiology.
- ii. Review of generic and condition-specific distress measures, to identify the elements comprising the construct of 'distress' in those measures and to identify items which could be adapted for the CDI.
- iii. Review of cardiac-specific measures incorporating elements of distress as defined by the present authors<sup>1</sup>.
- iv. Review of items for appropriateness for a post-operative cardiac population by the multidisciplinary investigator group.
- v. Focus group testing with two multidisciplinary groups of cardiac rehabilitation professionals: experienced practitioners undertaking intensive training in cardiac rehabilitation through the Australian Centre for Heart Health; and the National Executive of the Australian Cardiovascular Health and Rehabilitation Association (ACRA).
- vi. Consultation with, and feedback from, cardiac patients (key informants) on the structure and content of the CDI.

Consistent with the approach taken to the PROMIS item bank development and testing<sup>43</sup>, and our prior conceptualisation of the primary construct of cardiac distress as a multifactorial construct, we expect that the CDI will be a multidimensional measure incorporating emotional, belief, behavioural, cognitive and social domains<sup>1</sup>

### Patient and public involvement

The need for a comprehensive measure of cardiac-related distress has been identified by the multidisciplinary clinician researcher members of the CDI development group, through their clinical practice in provision of psychosocial support to cardiac patients. This need has been endorsed by the authors' consultations with both individual patients and patient support groups such as the hospital-based or regionally-based Heart Beat programs such as Heart Beat Victoria. As evident from step vi in the item generation procedure, patients will be consulted as key informants about the structure and content of the CDI. Only after this process of consultation is complete will the CDI item pool be tested with 400 cardiac patients.

### Ethics approval and dissemination of the CDI measure

This study has been approved by the Monash Health Human Research Ethics Committee (Approval number – RES-19-0000631L-55979 0) to run from May 2020 until May 2022.

The result of the CDI development project, the psychometrically sound *Cardiac Distress Inventory*, will be made available to clinicians and researchers without charge, but with a request that data collected in studies using the measure be made available for aggregation and analysis in future. The CDI will also be translated for use with clinical populations internationally with reporting of the psychometric properties of those versions. Confirmed translations will be Italian, Hebrew, Arabic, Farsi, and Spanish. Methods for translation vary<sup>44, 45</sup> but we will adopt the following strategy. The CDI will be translated independently by two bilingual cardiac psychologist clinician / researchers. These translations will then be back translated into English by a bilingual psychologist independent of the two original translators and not familiar with the CDI study. These back translations will be reviewed

by a subgroup of the investigators. Discrepancies will be resolved by consensus between the original translators and the review subgroup.

Study findings will be shared with community members, particularly cardiac patient support groups such as the Heart Beat peer support groups and their equivalents internationally; academic and medical communities via publications and presentations in which authorship will follow the Uniform Requirements for Manuscripts Submitted to Biomedical Journals. An online course and / or webinar on the CDI rationale and use will be provided at no cost by the Australian Centre for Heart Health. The short form will be made available on the website of the Australian Centre for Heart Health for completion by patients to self-screen with suggestions for follow up psychological support where significant distress is indicated.

### Cardiac Distress Inventory design

Items generated through the process outlined above will be reworded where appropriate to ensure relevance to the measurement of cardiac distress, and appropriateness of fit with the following instruction and response set:

*Living with a heart condition can sometimes be difficult. Listed below are some issues that people living with a heart condition may experience.*

*Please indicate whether or not you have experienced each issue during the past four weeks by checking 'Yes' or 'No'. For each item you have checked 'Yes', indicate how much distress this issue has caused you for the past four weeks, from 0 to 3, where "0" is no distress and "3" is severe distress.*

| Issue                                             | Yes                   | No                    | If yes, indicate how much distress this causes for you |                 |                   |                 |
|---------------------------------------------------|-----------------------|-----------------------|--------------------------------------------------------|-----------------|-------------------|-----------------|
|                                                   |                       |                       | No distress at all                                     | Slight distress | Moderate distress | Severe distress |
| Example: Having more pain than I expected to have | <input type="radio"/> | <input type="radio"/> | 0                                                      | 1               | 2                 | 3               |

### Trialling of the questionnaire for item reduction

#### Sample size required for trial

Recommendations of sample size for exploratory factor analysis in instrument development are that there should be at least 5 cases for each item in the instrument being used<sup>46</sup>. Rasch modelling for exploratory purposes should be based on at least N=100 and preferably N=250<sup>47</sup>. For the reliability and validation study, power calculations were conducted using GPower<sup>48</sup>. Given a probability level of 0.05, an anticipated effect size of 0.5, and a desired statistical power level of 0.8, a sample size of N=66 is required per group. A summary of the steps and the number required for each step in the analysis is provided in Table 1.

<Table 1 about here>

#### Inclusion and exclusion criteria

Eligible patients will be those who have had an acute coronary event - namely acute coronary syndrome (ACS), acute myocardial infarction (AMI) or coronary artery bypass graft surgery (CABGS) in the previous 6 months and who are attending either a CR program or an outpatient clinic at a participating hospital. Patients who do not have adequate English language proficiency to read and understand the PICF and questionnaire will be excluded.

### **Participant recruitment**

A Research Assistant (RA) will recruit patients at six months presentation directly through outpatient clinics or CR programs associated with the investigators. Clinic staff will advise the RA of potentially eligible patients and the RA will then approach these people to ascertain eligibility and willingness to participate. Specific arrangements for site visits will be made between the RA and site investigator by email and telephone. Overall and site-specific ethical approval will be in place.

In order to calculate a response rate, the RA will document the number of patients approached and the number who agree to participate and who do not. No identifying information on either participants or non-participants will be collected.

### **Data collection**

Consenting participants will complete the PICF and the trial-version CDI, together with basic socio-demographic and event-related information. No identifying information (name, address, date of birth) will be collected as no patient follow-up is required. For reliability and validity testing, participants will also be required to complete the four Emotion Thermometers<sup>49</sup>, the Kessler Psychological Distress Scale-6<sup>50</sup> (K6) and the PHQ-4<sup>51</sup>. In the event that the patient experiences distress while completing the questionnaire, the patient will be reminded by the RA that he/she is free to withdraw from the study (i.e., not continue with completing the questionnaire) and will be invited to contact the Australian Centre for Heart Health for a consultation with a clinical psychology specialist at no cost to the patient.

### **Measures**

In addition to the *trial-version CDI*, the following measures will be administered:

*Demographic questionnaire*: Basic socio-demographic (e.g., age, sex, marital status, living arrangement) and cardiac event-related information (event type, date of event) will be collected.

*Emotion Thermometers*. The Emotion Thermometers are single-item measures of distress (DT), anxiety (AnxT), depression, (DepT) and anger (AngT). They consist of a “thermometer” with numerals displayed vertically from 0 to 10. Patients rate their distress “over the last week”, with 0 indicating “no distress” and 10 indicating “high distress”. A total score from all four mood thermometers (ETsum) indicates overall emotional problems. These thermometers, based on the NCCN cancer distress thermometer (DT)<sup>27</sup>, have been shown to be a clinically sensitive measure of distress in patients with mixed cardiovascular conditions<sup>49</sup>.

*Patient Health Questionnaire-4*<sup>51</sup> (PHQ-4): The PHQ is a validated brief screener (4-items) for anxiety and depression, which combines the Patient Health Questionnaire-2 (PHQ-2) and the Generalized Anxiety Disorder-2 (GAD-2)<sup>51</sup>. Total scores range from 0-12, with 0 indicating “no distress” and 12 indicating “severe distress”.

*Kessler Psychological Distress Scale-6*<sup>50</sup> (K6): The Kessler 6 is a brief measure of psychological distress which has been validated in an Australian general population<sup>50</sup>. The K6 is both an effective screening measure and an indicator of distress severity. Scores range from 6-30, with lower scores indicating higher levels of distress.

*Screening Tool for Psychological Distress*<sup>36</sup> (STOP-D): This is a five-item, evidence-derived self-report measure generating severity scores for depression, anxiety, stress, anger and poor social support. The screening tool has been tested with patients before and after heart transplant, patients in cardiac rehabilitation and adults with congenital heart disease<sup>36</sup>.

### **Statistical analysis for the trial**

#### **Part A – Establishing dimensions of the CDI**

Principal component analysis (PCA) using SPSS will be used to assess the dimensions of the CDI. PCA is commonly used in the development of new instruments to provide early indications of possible dimensions before Rasch analysis is attempted<sup>52</sup>. PCA is used to extract the factors followed by oblique rotation of factors using Oblimin rotation ( $\delta = 0$ ). Kaiser's criterion, which retains eigen values above 1, will be used to guide the identification of relevant factors. A second step in the PCA is to conduct Horn's parallel analysis<sup>53</sup>, considered one of the most accurate approaches to estimate the number of components<sup>54</sup>. The size of eigen values obtained from PCA are compared with those obtained from a randomly generated data set of the same size. Only factors with eigen values exceeding the values obtained from the corresponding random data set are retained for further investigation.

### **Part B - Eliminating items per dimension of the CDI**

Rasch analysis is a mathematical technique used to evaluate a latent variable not measurable directly from a set of categorical items. Rasch methods can be used to assess the extent to which individual items represent the underlying construct that an instrument intends to measure. The Rasch model chosen for this analysis, the Partial Credit Model<sup>55</sup> is applicable to polytomous rather than dichotomous data and is therefore suitable for Likert scales and response ratings.

Rasch analysis will be conducted using RUMM2030 software (RUMM Laboratory Pty Ltd., Perth, Australia). Three statistics are considered to determine the degree of fit for each CDI scale: overall fit; individual person fit; and individual item fit<sup>56</sup>. Adequate overall fit of the CDI to the Rasch model is indicated by a non-significant Bonferroni adjusted Chi-square probability value<sup>57</sup>. Satisfactory overall item and individual fit for each scale will be determined by a fit residual standard deviation (SD) value of  $\leq 1.5$ . Individual item fit is indicated by two statistics: fit residual values; and Chi-square probability values. Item fit residual values  $-2.5$  to  $2.5$  indicate adequate fit<sup>58</sup>. Above this range (underfit) suggests deviation from the model, below (overfit) suggests that some items in the scale are similar to each other<sup>59</sup>. A perfect model fit would be reflected by residuals with a mean of 0.00 and a SD of 1.00. Any mis-fitting item in terms of infit/outfit is discarded and the analysis re-run. This iterative process is continued until no further misfit is observed<sup>60</sup>. The Rasch analysis will produce the person separation index (PSI), which indicates the degree to which study participants can be differentiated into certain groups (PSI range 0–1). Values for PSI of 0.8 are acceptable<sup>61</sup>. A sample size of at least 100 patients is required to perform a Rasch analysis which can estimate an acceptable PSI value<sup>47</sup>.

Statistical significance will be considered at the 5% level and Bonferroni correction for multiple testing will be applied where appropriate.

### **Psychometric properties of the final Cardiac Distress Inventory**

The COSMIN (Consensus-based Standards for the selection of health Measurement Instruments) criteria for evaluating the methodological quality of health-related patient-reported outcomes will be used to inform the development of the methodology for determining the psychometric properties as far as possible<sup>62, 63</sup>.

#### **Reliability**

Internal consistency of the CDI will be determined using Cronbach's alpha, and evaluation of the Person Separation Index (PSI) from the Rasch analysis.

#### **Validity**

Scale comparisons will be used to investigate the concurrent convergent validity of the CDI. Pearson correlation coefficients will be calculated to explore the association between CDI scores and the measure that is commonly used in clinical practice to assess distress, the six-item Kessler K6<sup>50</sup>. Subscale scores of the CDI will be compared with K6 scores where appropriate. We will assess the discriminant validity and predictive validity of the CDI by assessing whether it distinguishes between

1  
2  
3 patients scoring high and low on the K6, using the Australian scoring cut-off of 19 to indicate  
4 probable serious mental illness<sup>64</sup>. Again, both CDI total and factor scores will be investigated. It is not  
5 possible to use a measure of cardiac distress for validity testing as no such measure exists.  
6

7 Pearson correlation coefficients will also be calculated to explore the association between CDI scores  
8 and the Patient Health Questionnaire–4 (PHQ4)<sup>51</sup>. Normative data are available from a nationally  
9 representative face-to-face household survey sample of 5030 people, conducted in Germany in  
10 2006<sup>65</sup>. The measure has been translated and validated in Hispanic populations, for example<sup>66</sup>, and  
11 has been used in studies of cancer patients<sup>67</sup> and emergency department patients<sup>68</sup>. As far as the  
12 authors are aware, no validation study of the PHQ-4 has been undertaken with cardiac patients.  
13

14 Comparison of CDI scores will also be conducted between the various types of cardiac patients (e.g.  
15 AMI vs CABGS). Comparison of groups will be conducted via analysis of variance (ANOVA).  
16

### 17 **Latent Class Analysis**

18 Latent class analysis (LCA) will be used in order to describe groups of participants that differ in their  
19 response patterns to the CDI. LCA explains inter-individual differences in response patterns by  
20 means of a given number of latent classes (subgroups of participants). LCA estimates the size of the  
21 classes and a membership probability for each participant within each class<sup>69</sup> and will be performed  
22 using Mplus version 6.0<sup>70</sup>. To select the most parsimonious number of classes and maximise model  
23 fit, a series of latent class models will be applied to the data. First, the simplest 1-class model (all  
24 patients are assumed to have the same pattern of cardiac distress) will be applied to the data,  
25 followed by successive models with a unitary increase in the number of latent classes (up to eight).  
26 Model solutions are evaluated on the basis of their Bayesian information criterion (BIC) and entropy.  
27 The BIC has been shown to be a robust indicator of model fit, with lower values indicative of better  
28 model fit<sup>71</sup>. BIC will be used in preference to Akaike information criteria, as the latter has been  
29 shown to over-extract classes in simulation models<sup>72</sup>. The association of CDI latent class membership  
30 with CDI scale scores, sociodemographic characteristics, diagnosis and K6 distress scores will also be  
31 examined using Mplus<sup>70</sup>. Mplus generates overall chi-square values to assess significant associations  
32 between variables as well as unadjusted chi-square values for exploratory post-hoc analysis.  
33  
34  
35

### 36 **Development of a short form Cardiac Distress Inventory for screening purposes**

37 A shorter version of the CDI, the CDI-S, will then be created. Importantly, item reduction based on  
38 rigorous methodological guidelines is necessary to maintain validity when shortening composite  
39 measurement scales<sup>73</sup>. In addition, there are a number of ways to achieve item reduction<sup>74</sup>. In light  
40 of these two points, we will use two methods to develop the short form screening tool – a clinically  
41 oriented method and a statistically-driven method. A concept-retention approach will create a short  
42 version of the original measure by selection of the top performing item in each domain to become  
43 part of the short, concept-retention version<sup>75</sup>. Rasch analysis as used in a number of health-related  
44 item reduction exercises, will also be employed<sup>76, 77</sup>. The Rasch analysis and psychometric evaluation  
45 of the CDI-S will follow the format described by Nishigami and colleagues<sup>77</sup>. Both versions of the CDI-  
46 S will then be field tested.  
47  
48

### 49 **Thermometer testing**

50 Receiver operating characteristic (ROC) analysis will be used to identify the optimal CDI scale cut off  
51 score for distinguishing whether a person experiences clinically significant distress as defined by the  
52 established cut-off thresholds for ETsum (the sum of all four mood thermometers). The Area Under  
53 the Curve (AUC) will be used to estimate the overall discriminative accuracy of the CDI scale cut off  
54 score relative to the established cut off scores of ETsum (a score >14 indicates moderate and >20  
55 indicates severe emotional problems). Using qualitative guidelines for interpreting AUC values<sup>78</sup>,  
56 namely AUC≤0.70 as acceptable discrimination, AUC≤0.80 as good discrimination and AUC≤0.90 as  
57 excellent discrimination. ROC curves will be used to show the trade-off between the sensitivity (true-  
58 positive rate) and specificity (true-negative rate) for every possible cut off score of the CDI Scale.  
59  
60



## TIMELINE

Months 1-2: staff recruitment, CR site recruitment and liaison; Months 3-18: Administration of the full item pool draft CDI to patients attending CR or outpatient appointments. Months 19-21: completion of data analysis; Months 22-24: writing up the study findings will be a continuous activity with completion in months 22-24.

## SUMMARY

Cardiac distress is complex and various aspects of cardiac distress have been shown to be common among cardiac patients. Before cardiac distress can be treated effectively, it needs to be properly measured by a reliable, valid and sensitive instrument. Stress is increasingly being recognised as a prognostic factor in those with pre-existing cardiovascular or cerebrovascular disease<sup>79</sup> and stress management in cardiac rehabilitation shows promise<sup>80</sup>. Even so, we are yet to see the totality of cardiac distress, in all of its complexity, being addressed in this way.

The primary aim of the project, therefore, is to develop a new clinical measure which health professionals can use to identify and assess cardiac distress. They can use the fine-grained assessment provided by this unique measure to structure psychological and emotional interventions to intervene in cases of persistent distress in patients, following a cardiac event. No such measure currently exists.

While physical recovery remains the highest priority in preventive cardiology, psychological recovery is now considered a primary concern for health professionals working in cardiac rehabilitation and secondary prevention. The prevalence of clinical anxiety and depression in people who have had a cardiac event is up to four times higher than in the general population, however both the prevalence and nature of the broader concept of cardiac-related distress remains unknown. Post-event psychological problems confer an increased mortality risk for patients, highlighting the importance of identifying distressed patients early in order to ensure appropriate treatment is received. The new CDI will not only enhance clinicians' ability to identify distressed patients but will also enable them to identify the specific nature of the distress, thereby optimising their ability to provide timely support targeted to the specific psychosocial needs of the patient. The new CDI has the potential to ensure that patients are provided with the specific support they require in their psychosocial recovery after a cardiac event and, in doing so, has the potential to improve their quality of life, enhance their behaviour change efforts and ultimately extend their survival.

## References

1. Jackson AC, Murphy BM, Thompson DR, et al. What is cardiac distress and how should we measure it? *British Journal of Cardiac Nursing* 2018; 13: 286-293. DOI: 10.12968/bjca.2018.13.6.286.
2. Stewart RAH, Colquhoun DM, Marschner SL, et al. Persistent psychological distress and mortality in patients with stable coronary artery disease. *Heart* 2017; 103: 1860-1866. 2017/06/28. DOI: 10.1136/heartjnl-2016-311097.
3. Lissaker CT, Wallert J, Held C, et al. Emotional distress as a predictor of statin non-adherence among Swedish first-time myocardial infarction patients, 2006-2013. *J Psychosom Res* 2017; 97: 30-37. 2017/06/14. DOI: 10.1016/j.jpsychores.2017.02.015.
4. Habibović M, Mudde L, Pedersen SS, et al. Sleep disturbance in patients with an implantable cardioverter defibrillator: Prevalence, predictors and impact on health status. *European Journal of Cardiovascular Nursing* 2017; 17: 390-398. DOI: 10.1177/1474515117748931.
5. Sipotz J, Friedrich O, Hofer S, et al. Health related quality of life and mental distress after PCI: restoring a state of equilibrium. *Health Qual Life Outcomes* 2013; 11: 144. 2013/08/29. DOI: 10.1186/1477-7525-11-144.



6. Gostoli S, Roncuzzi R, Urbinati S, et al. Clinical and Subclinical Distress, Quality of Life, and Psychological Well-Being after Cardiac Rehabilitation. *Applied psychology Health and well-being* 2017; 9: 349-369. 2017/11/25. DOI: 10.1111/aphw.12098.
7. Russ TC, Stamatakis E, Hamer M, et al. Association between psychological distress and mortality: individual participant pooled analysis of 10 prospective cohort studies. *BMJ (Clinical research ed)* 2012; 345: e4933. 2012/08/02. DOI: 10.1136/bmj.e4933.
8. Snaith RP and Zigmond AS. *The Hospital Anxiety and Depression Scale - Manual*. Windsor, UK: NFER-Nelson, 1994.
9. Goldberg DP and Hillier VF. A scaled version of the General Health Questionnaire. *Psychol Med* 1979; 9: 139-145. 1979/02/01.
10. Kessler RC, Andrews G, Colpe LJ, et al. Short screening scales to monitor population prevalences and trends in non-specific psychological distress. *Psychol Med* 2002; 32: 959-976. 2002/09/07.
11. Virtanen M, Elovainio M, Josefsson K, et al. Coronary heart disease and risk factors as predictors of trajectories of psychological distress from midlife to old age. *Heart* 2017; 103: 659-665. 2016/11/20. DOI: 10.1136/heartjnl-2016-310207.
12. Kachur S, Menezes AR, De Schutter A, et al. Significance of Comorbid Psychological Stress and Depression on Outcomes After Cardiac Rehabilitation. *Am J Med* 2016; 129: 1316-1321. 2016/08/03. DOI: 10.1016/j.amjmed.2016.07.006.
13. Whitehead DL, Strike P, Perkins-Porras L, et al. Frequency of distress and fear of dying during acute coronary syndromes and consequences for adaptation. *Am J Cardiol* 2005; 96: 1512-1516. 2005/11/29. DOI: 10.1016/j.amjcard.2005.07.070.
14. Claesson M, Burell G, Birgander LS, et al. Psychosocial distress and impaired quality of life - targets neglected in the secondary prevention in women with ischaemic heart disease. *European Journal of Cardiovascular Prevention & Rehabilitation* 2003; 10: 258-266. DOI: 10.1097/01.hjr.0000085255.65733.68.
15. Malinauskaite I, Slapikas R, Courvoisier D, et al. The fear of dying and occurrence of posttraumatic stress symptoms after an acute coronary syndrome: A prospective observational study. *Journal of health psychology* 2017; 22: 208-217. 2015/08/28. DOI: 10.1177/1359105315600233.
16. Denton E-gD, Rieckmann N, Davidson KW, et al. Psychosocial Vulnerabilities to Depression after Acute Coronary Syndrome: The Pivotal Role of Rumination in Predicting and Maintaining Depression. *Frontiers in Psychology* 2012; 3: 288. DOI: 10.3389/fpsyg.2012.00288.
17. Herschbach P, Berg P, Dankert A, et al. Fear of progression in chronic diseases: psychometric properties of the Fear of Progression Questionnaire. *J Psychosom Res* 2005; 58: 505-511. 2005/08/30. DOI: 10.1016/j.jpsychores.2005.02.007.
18. Vilchinsky N, Ginzburg K, Fait K, et al. Cardiac-disease-induced PTSD (CDI-PTSD): A systematic review. *Clinical Psychology Review* 2017; 55: 92-106. DOI: <https://doi.org/10.1016/j.cpr.2017.04.009>.
19. Vaccarino V and Bremner D. Posttraumatic Stress Disorder and Risk of Cardiovascular Disease. In: Alvarenga ME and Byrne D (eds) *Handbook of Psychocardiology*. Singapore: Springer Science + Business Media, 2016, pp.265-282.
20. Cotter G, Milo-Cotter O, Rubinstein D, et al. Posttraumatic stress disorder: A missed link between psychiatric and cardiovascular morbidity? *CNS Spectrums* 2006; 11: 129-136.
21. Shemesh E, Koren-Michowitz M, Yehuda R, et al. Symptoms of posttraumatic stress disorder in patients who have had a myocardial infarction. *Psychosomatics* 2006; 47: 231-239.
22. Murphy BM, Higgins RO, Jackson AC, et al. Patients want to know about the 'cardiac blues'. *Australian family physician* 2015; 44: 826-832.
23. Higgins RO, Murphy BM, Nicholas A, et al. Emotional and adjustment issues faced by cardiac patients seen in clinical practice: a qualitative survey of experienced clinicians. *J Cardiopulm Rehabil Prev* 2007; 27: 291-297. 2007/09/22. DOI: 10.1097/01.HCR.0000291296.62894.e5.

- 1  
2  
3 24. Murphy BM, Higgins RO and Jackson AC. Anxiety, depression and psychological adjustment  
4 after an acute cardiac event. In: Alvarenga ME and Byrne D (eds) *Handbook of Psychocardiology*.  
5 Singapore: Springer, 2016.
- 6 25. Murphy BM, Elliott PC, Higgins RO, et al. Anxiety and depression after coronary artery  
7 bypass graft surgery: most get better, some get worse. *Eur J Cardiovasc Prev Rehabil* 2008; 15: 434-  
8 440. 2008/08/05. DOI: 10.1097/HJR.0b013e3282fbc945.
- 9 26. Tully PJ and Baker RA. Depression, anxiety, and cardiac morbidity outcomes after coronary  
10 artery bypass surgery: a contemporary and practical review. *Journal of Geriatric Cardiology* 2012; 9:  
11 197-208.
- 12 27. NCCN. NCCN Clinical Guidelines in Oncology. *Distress Management Version 22017*. National  
13 Comprehensive Cancer Network, 2017.
- 14 28. Ridner SH. Psychological distress: concept analysis. *J Adv Nurs* 2004; 45: 536-545.  
15 2004/03/11.
- 16 29. Dennick K, Sturt J and Speight J. What is diabetes distress and how can we measure it? A  
17 narrative review and conceptual model. *Journal of diabetes and its complications* 2017; 31: 898-911.  
18 2017/03/10. DOI: 10.1016/j.jdiacomp.2016.12.018.
- 19 30. Snoek FJ, Bremmer MA and Hermanns N. Constructs of depression and distress in diabetes:  
20 time for an appraisal. *The lancet Diabetes & endocrinology* 2015; 3: 450-460. 2015/05/23. DOI:  
21 10.1016/s2213-8587(15)00135-7.
- 22 31. Barry V, Stout ME, Lynch ME, et al. The effect of psychological distress on health outcomes:  
23 A systematic review and meta-analysis of prospective studies. *Journal of health psychology* 2019:  
24 1359105319842931. DOI: 10.1177/1359105319842931.
- 25 32. Hare DL and Davis CR. Cardiac Depression Scale: validation of a new depression scale for  
26 cardiac patients. *J Psychosom Res* 1996; 40: 379-386. 1996/04/01. DOI: 0022399995006125 [pii].
- 27 33. Bennett SJ, Puntenney PJ, Walker NL, et al. Development of an instrument to measure threat  
28 related to cardiac events. *Nursing research* 1996; 45: 266-270. 1996/09/01.
- 29 34. Eifert GH, Thompson RN, Zvolensky MJ, et al. The cardiac anxiety questionnaire:  
30 development and preliminary validity. *Behav Res Ther* 2000; 38: 1039-1053. 2000/09/27.
- 31 35. Valenti L, Lim L, Heller RF, et al. An improved questionnaire for assessing quality of life after  
32 acute myocardial infarction. *Quality of life research : an international journal of quality of life aspects*  
33 *of treatment, care and rehabilitation* 1996; 5: 151-161. 1996/02/01.
- 34 36. Young QR, Ignaszewski A, Fofonoff D, et al. Brief screen to identify 5 of the most common  
35 forms of psychosocial distress in cardiac patients: validation of the screening tool for psychological  
36 distress. *J Cardiovasc Nurs* 2007; 22: 525-534. 2007/12/20. DOI:  
37 10.1097/01.jcn.0000297383.29250.14.
- 38 37. Thompson DR, Jenkinson C, Roebuck A, et al. Development and validation of a short  
39 measure of health status for individuals with acute myocardial infarction: the myocardial infarction  
40 dimensional assessment scale (MIDAS). *Quality of life research : an international journal of quality of*  
41 *life aspects of treatment, care and rehabilitation* 2002; 11: 535-543. 2002/09/11.
- 42 38. van Montfort E, Denollet J, Widdershoven J, et al. Validity of the European Society of  
43 Cardiology's Psychosocial Screening Interview in Patients With Coronary Artery Disease-The  
44 THORESCI Study. *Psychosom Med* 2017; 79: 404-415. 2016/12/07. DOI:  
45 10.1097/psy.0000000000000433.
- 46 39. Piepoli MF, Hoes AW, Agewall S, et al. European Guidelines on cardiovascular disease  
47 prevention in clinical practice: The Sixth Joint Task Force of the European Society of Cardiology and  
48 Other Societies on Cardiovascular Disease Prevention in Clinical Practice (constituted by  
49 representatives of 10 societies and by invited experts) Developed with the special contribution of the  
50 European Association for Cardiovascular Prevention & Rehabilitation (EACPR). . *Eur Heart J* 2016; 37:  
51 2315-2381.
- 52  
53  
54  
55  
56  
57  
58  
59  
60

- 1  
2  
3 40. Pedersen SS and Andersen CM. Minding the heart: Why are we still not closer to treating  
4 depression and anxiety in clinical cardiology practice? *European Journal of Preventive Cardiology*  
5 2017; 2047487317744367. DOI: 10.1177/2047487317744367.  
6  
7 41. Richards SH, Anderson L, Jenkinson CE, et al. Psychological interventions for coronary heart  
8 disease. *Cochrane Database Syst Rev* 2017; 4: Cd002902. 2017/04/30. DOI:  
9 10.1002/14651858.CD002902.pub4.  
10 42. Boateng GO, Neilands TB, Frongillo EA, et al. Best Practices for Developing and Validating  
11 Scales for Health, Social, and Behavioral Research: A Primer. *Frontiers in public health* 2018; 6: 149-  
12 149. DOI: 10.3389/fpubh.2018.00149.  
13 43. Riley WT, Pilkonis P and Cella D. Application of the National Institutes of Health Patient-  
14 reported Outcome Measurement Information System (PROMIS) to mental health research. *The*  
15 *journal of mental health policy and economics* 2011; 14: 201-208. 2012/02/22.  
16 44. Beaton DE, Bombardier C, Guillemin F, et al. Guidelines for the process of cross-cultural  
17 adaptation of self-report measures. *Spine (Phila Pa 1976)* 2000; 25: 3186-3191. 2000/12/22. DOI:  
18 10.1097/00007632-200012150-00014.  
19 45. Kinzie JD and Manson SM. The use of self-rating scales in cross-cultural psychiatry. *Hospital*  
20 *& Community Psychiatry* 1987; 38: 190-195.  
21 46. Polit DF and Beck CT. *Essentials of Nursing Research: Appraising Evidence For Nursing*  
22 *Practice, 9th Edition*. Philadelphia, USA: Wolters Kluwer, 2018.  
23 47. Chen WH, Lenderking W, Jin Y, et al. Is Rasch model analysis applicable in small sample size  
24 pilot studies for assessing item characteristics? An example using PROMIS pain behavior item bank  
25 data. *Quality of life research : an international journal of quality of life aspects of treatment, care and*  
26 *rehabilitation* 2014; 23: 485-493. 2013/08/06. DOI: 10.1007/s11136-013-0487-5.  
27 48. Faul F, Erdfelder E, Buchner A, et al. Statistical power analyses using G\*Power 3.1: tests for  
28 correlation and regression analyses. *Behavior research methods* 2009; 41: 1149-1160. 2009/11/10.  
29 DOI: 10.3758/brm.41.4.1149.  
30 49. Mitchell AJ, Morgan JP, Petersen D, et al. Validation of simple visual-analogue thermometer  
31 screen for mood complications of cardiovascular disease: the Emotion Thermometers. *J Affect Disord*  
32 2012; 136: 1257-1263. 2011/07/05. DOI: 10.1016/j.jad.2011.06.008.  
33 50. Furukawa TA, Kessler RC, Slade T, et al. The performance of the K6 and K10 screening scales  
34 for psychological distress in the Australian National Survey of Mental Health and Well-Being. *Psychol*  
35 *Med* 2003; 33: 357-362. 2003/03/08.  
36 51. Kroenke K, Spitzer RL, Williams JBW, et al. An Ultra-Brief Screening Scale for Anxiety and  
37 Depression: The PHQ-4. *Psychosomatics* 2009; 50: 613-621. DOI: [https://doi.org/10.1016/S0033-3182\(09\)70864-3](https://doi.org/10.1016/S0033-3182(09)70864-3).  
38 52. Tennant A and Pallant J. Unidimensionality Matters *Rasch Measurement Transactions* 2006;  
39 20: 1048-1051.  
40 53. Horn JL. A rationale and test for the number of factors in factor analysis. *Psychometrika*  
41 1965; 30: 179-185. DOI: 10.1007/BF02289447.  
42 54. Zwick WR and Velicer WF. Comparison of five rules for determining the number of  
43 components to retain. *Psychological bulletin* 1986; 99: 432-442.  
44 55. Masters GN. A rasch model for partial credit scoring. *Psychometrika* 1982; 47: 149-174. DOI:  
45 10.1007/BF02296272.  
46 56. Bell RC. Person fit and person reliability. *Educational Research & Perspectives* 1982; 9: 105-  
47 113.  
48 57. Shea TL, Tennant A and Pallant JF. Rasch model analysis of the Depression, Anxiety and  
49 Stress Scales (DASS). *BMC psychiatry* 2009; 9: 21. 2009/05/12. DOI: 10.1186/1471-244x-9-21.  
50 58. Ramp M, Khan F, Misajon RA, et al. Rasch analysis of the Multiple Sclerosis Impact Scale  
51 MSIS-29. *Health Qual Life Outcomes* 2009; 7: 58. 2009/06/24. DOI: 10.1186/1477-7525-7-58.  
52 59. Sharrack B, Hughes RA, Soudain S, et al. The psychometric properties of clinical rating scales  
53 used in multiple sclerosis. *Brain* 1999; 122 ( Pt 1): 141-159. 1999/03/02.  
54  
55  
56  
57  
58  
59  
60

- 1
  - 2
  - 3
  - 4
  - 5
  - 6
  - 7
  - 8
  - 9
  - 10
  - 11
  - 12
  - 13
  - 14
  - 15
  - 16
  - 17
  - 18
  - 19
  - 20
  - 21
  - 22
  - 23
  - 24
  - 25
  - 26
  - 27
  - 28
  - 29
  - 30
  - 31
  - 32
  - 33
  - 34
  - 35
  - 36
  - 37
  - 38
  - 39
  - 40
  - 41
  - 42
  - 43
  - 44
  - 45
  - 46
  - 47
  - 48
  - 49
  - 50
  - 51
  - 52
  - 53
  - 54
  - 55
  - 56
  - 57
  - 58
  - 59
  - 60
60. Wu M and Adams R. Applying the Rasch model to psycho-social measurement: A practical approach. In: Educational Measurement Solutions, (ed.). Melbourne 2007.
61. Prieto L, Alonso J and Lamarca R. Classical Test Theory versus Rasch analysis for quality of life questionnaire reduction. *Health Qual Life Outcomes* 2003; 1: 27. 2003/09/04. DOI: 10.1186/1477-7525-1-27.
62. Mokkink LB, Terwee CB, Knol DL, et al. The COSMIN checklist for evaluating the methodological quality of studies on measurement properties: a clarification of its content. *BMC Med Res Methodol* 2010; 10: 22. 2010/03/20. DOI: 10.1186/1471-2288-10-22.
63. Terwee CB, Bot SD, de Boer MR, et al. Quality criteria were proposed for measurement properties of health status questionnaires. *J Clin Epidemiol* 2007; 60: 34-42. 2006/12/13. DOI: 10.1016/j.jclinepi.2006.03.012.
64. Kessler RC, Green JG, Gruber MJ, et al. Screening for Serious Mental Illness in the General Population with the K6 screening scale: results from the WHO World Mental Health (WMH) survey initiative *International Journal of Methods in Psychiatric Research* 2010; 19: 4-22.
65. Löwe B, Wahl I, Rose M, et al. A 4-item measure of depression and anxiety: Validation and standardization of the Patient Health Questionnaire-4 (PHQ-4) in the general population. *Journal of Affective Disorders* 2010; 122: 86-95. DOI: <https://doi.org/10.1016/j.jad.2009.06.019>.
66. Kocalevent R-D, Finck C, Jimenez-Leal W, et al. Standardization of the Colombian version of the PHQ-4 in the general population. *BMC psychiatry* 2014; 14: 205-205. DOI: 10.1186/1471-244X-14-205.
67. Nipp RD, El-Jawahri A, Moran SM, et al. The relationship between physical and psychological symptoms and health care utilization in hospitalized patients with advanced cancer. *Cancer* 2017; 123: 4720-4727. 2017/10/23. DOI: 10.1002/cncr.30912.
68. Faessler L, Kutz A, Haubitz S, et al. Psychological distress in medical patients 30 days following an emergency department admission: results from a prospective, observational study. *BMC emergency medicine* 2016; 16: 33-33. DOI: 10.1186/s12873-016-0097-y.
69. Lanza ST and Rhoades BL. Latent class analysis: an alternative perspective on subgroup analysis in prevention and treatment. *Prevention science : the official journal of the Society for Prevention Research* 2013; 14: 157-168. 2011/02/15. DOI: 10.1007/s11121-011-0201-1.
70. MPLUS (Version 6.11). Los Angeles, Calif.: Muthen & Muthen.
71. D'Unger AV, Land KC, McCall PL, et al. How many latent classes of delinquent/criminal careers? Results from mixed Poisson regression analyses. *American Journal of Sociology* 1998; 103: 1593-1630.
72. Nylund KL, Asparouhov T and Muthén BO. Deciding on the Number of Classes in Latent Class Analysis and Growth Mixture Modeling: A Monte Carlo Simulation Study. *Structural Equation Modeling: A Multidisciplinary Journal* 2007; 14: 535-569. DOI: 10.1080/10705510701575396.
73. Goetz C, Coste J, Lemetayer F, et al. Item reduction based on rigorous methodological guidelines is necessary to maintain validity when shortening composite measurement scales. *J Clin Epidemiol* 2013; 66: 710-718. 2013/04/10. DOI: 10.1016/j.jclinepi.2012.12.015.
74. Coste J, Guillemin F, Pouchot J, et al. Methodological approaches to shortening composite measurement scales. *J Clin Epidemiol* 1997; 50: 247-252. 1997/03/01. DOI: 10.1016/s0895-4356(96)00363-0.
75. Beaton DE, Wright JG, Katz JN, et al. Development of the QuickDASH: Comparison of three item-reduction approaches. *Journal of Bone and Joint Surgery* 2005; 87-A: 1038-1046.
76. Las Hayas C, Quintana JM, Padierna JA, et al. Use of Rasch methodology to develop a short version of the health related quality of life for eating disorders questionnaire: a prospective study. *Health and quality of life outcomes* 2010; 8: 29-29. DOI: 10.1186/1477-7525-8-29.
77. Nishigami T, Tanaka K, Mibu A, et al. Development and psychometric properties of short form of central sensitization inventory in participants with musculoskeletal pain: A cross-sectional study. *PLOS ONE* 2018; 13: e0200152. DOI: 10.1371/journal.pone.0200152.

- 1  
2  
3 78. Hosmer D and Lemeshow S. Applied Logistic Regression. Wiley-Interscience : New York.  
4 2000.  
5 79. Kivimaki M and Steptoe A. Effects of stress on the development and progression of  
6 cardiovascular disease. *Nat Rev Cardiol* 2017. DOI: 10.1038/nrcardio.2017.189.  
7  
8 80. Blumenthal JA, Sherwood A, Smith PJ, et al. Enhancing Cardiac Rehabilitation With Stress  
9 Management Training: A Randomized, Clinical Efficacy Trial. *Circulation* 2016; 133: 1341-1350.  
10 2016/04/06. DOI: 10.1161/circulationaha.115.018926.  
11  
12  
13  
14  
15  
16  
17  
18  
19  
20  
21  
22  
23  
24  
25  
26  
27  
28  
29  
30  
31  
32  
33  
34  
35  
36  
37  
38  
39  
40  
41  
42  
43  
44  
45  
46  
47  
48  
49  
50  
51  
52  
53  
54  
55  
56  
57  
58  
59  
60

For peer review only

1  
2  
3 **Authors contributions:** AJ drafted the article with MLG drafting the psychometric testing  
4 component. MR, MLG, DR, CS, MA, JA, RO, MR, BM made contributions to the resulting draft. All  
5 authors approved the final version.  
6

7 **Funding:** This project received no specific grant from any funding agency in the public, commercial  
8 or not-for-profit sectors.  
9

10 **Competing interests:** All authors declare that they have no competing interests.  
11

12 **Acknowledgements:** The authors would like to thank the patients and patient support groups who  
13 assisted in the development of the CDI version for testing. They would also like to acknowledge the  
14 generous posthumous gift by Ms Angela Anita Reid to the Australian Centre for Heart Health which  
15 is funding this project.  
16  
17  
18  
19  
20  
21  
22  
23  
24  
25  
26  
27  
28  
29  
30  
31  
32  
33  
34  
35  
36  
37  
38  
39  
40  
41  
42  
43  
44  
45  
46  
47  
48  
49  
50  
51  
52  
53  
54  
55  
56  
57  
58  
59  
60

For peer review only



Table 1: Numbers required for each stage of the development and testing of the Cardiac Distress Inventory

| Steps                       | Purpose                                                    | N required with rationale                                                                                                                                                                                                                                                                                                                                     |
|-----------------------------|------------------------------------------------------------|---------------------------------------------------------------------------------------------------------------------------------------------------------------------------------------------------------------------------------------------------------------------------------------------------------------------------------------------------------------|
| <i>Development</i>          |                                                            |                                                                                                                                                                                                                                                                                                                                                               |
| Exploratory Factor Analysis | Establish number of dimensions                             | (74 items X 5=370) cardiac patients (AMI, AF, CABGS, unstable angina plus heart failure patients with New York Heart Association (NYHA) classification of mild (NYHA 11) or moderate (NYHA 111) heart failure. Allowing for 10 percent missing data, a sample size of (74 items X 5=370 + 10% = 407) would therefore be required for this phase of the study. |
| Rasch Analysis              | Eliminate items per dimension                              | The Rasch Analysis will utilise the total baseline sample and will not require a sub-sample.                                                                                                                                                                                                                                                                  |
| <i>Testing</i>              |                                                            |                                                                                                                                                                                                                                                                                                                                                               |
| Construct validity          |                                                            | 66 cardiac patients administered both the CDI and K6. (Using the reduced item version of the CDI).                                                                                                                                                                                                                                                            |
| Latent Class Analysis       | Identify inter-individual differences in response patterns | The LCA analysis will utilise the total baseline sample and will not require a sub-sample.                                                                                                                                                                                                                                                                    |
